# Supplementary material
Source: Research Square preprint supplement (doi:10.21203/rs.3.rs-9728301/v1)
Supplement: Supplementary file 1 [file 0f03e787ae6850ef94a389cb.xlsx]

## Sheet: atpB
CRISPRi atpB mutant — SNP summary
#	1	3680459	1	3680460	chr1	chr1	Type	Locus affected	Effect/Consequence	Notes
37452	t	a	37452	0	0	0	substituion	NON CDS	Substitution downstream dCas9 coding region, gene unaffected.
37454	.	g	37455	0	0	0	insertion	NON CDS	Substitution downstream dCas9 coding region, gene unaffected.
37468	g	a	37469	0	0	0	substituion	NON CDS	Substitution downstream dCas9 coding region, gene unaffected.
37535	t	.	37535	0	0	0	deletion	NON CDS	Deletion downstream dCas9 coding region, gene unaffected.
37536	a	.	37535	0	0	0	deletion	NON CDS	Deletion downstream dCas9 coding region, gene unaffected.
37539	a	.	37537	0	0	0	deletion	NON CDS	Deletion downstream dCas9 coding region, gene unaffected.
48113	t	.	48110	0	0	0	deletion	NON CDS	Deletion in a non-coding region.
1433073	.	g	1433071	0	0	0	insertion	NON CDS	Insertion in a non-coding region.
2251704	c	.	2251701	0	0	0	deletion	K562_RS04280	Deletion in a polysaccharide deacetylase family protein CDS.
2439077	.	g	2439075	0	0	0	insertion	K562_RS03415	Insertion in a biotin synthase (bioB) CDS.
2522973	.	a	2522972	0	0	0	insertion	NON CDS	Insertion in a non-coding region.
2950362	t	g	2950361	0	0	0	substituion	K562_RS00935	Substitution in a site-specific integrase CDS.
3200297	.	g	3200297	0	0	0	insertion	NON CDS	Insertion in a non-coding region.
3679460	.	t	3679461	0	0	0	insertion	NON CDS	Insertion in a non-coding region.
#	1	3211508	1	3211507	chr2	chr2
388393	c	.	388392	0	0	0	deletion	K562_RS28860	Deletion in a porin CDS.	Two mutations in the same gene.
388523	c	g	388522	0	0	0	substituion	K562_RS28860	Substitution in a porin CDS.	Two mutations in the same gene.
388897	t	.	388895	0	0	0	deletion	NON CDS	Deletion in a non-coding region.
472681	.	g	472680	0	0	0	insertion	NON CDS	Insertion in a non-coding region.
2156101	t	.	2156099	0	0	0	deletion	K562_RS20940	Deletion in a LysR family transcriptional regulator CDS.	Two mutations in one gene.
2156105	t	c	2156103	0	0	0	substituion	K562_RS20940	Substitution in a LysR family transcriptional regulator CDS.	Two mutations in one gene.
3205509	.	t	3205508	0	0	0	insertion	NON CDS	Insertion in a non-coding region.
#	1	760832	1	760833	chr3	chr3
671195	.	c	671196	0	0	0	insertion	K562_RS31725	Insertion in a IS3 family transposase CDS.
#	1	92660	1	92660	mpl	mpl			No mutations detected.
#	1	5602	1	5602	pg	pg			No mutations detected.

## Sheet: dcw cluster
CRISPRi dcw cluster mutant — SNP summary
#	1	3680454	1	3680463	chr1	chr1	Type	Locus affected	Effect/Consequence	Notes
289855	.	a	289856	0	0	0	insertion	NON CDS	Insertion in a non-coding region.
374745	.	a	374747	0	0	0	insertion	NON CDS	Insertion in a non-coding region.
664474	.	a	664477	0	0	0	insertion	NON CDS	Insertion in a non-coding region.
699852	.	g	699856	0	0	0	insertion	NON CDS	Insertion in a non-coding region.
1027392	.	t	1027397	0	0	0	insertion	NON CDS	Insertion in a non-coding region.
1089793	.	c	1089799	0	0	0	insertion	NON CDS	Insertion in a non-coding region.
1110659	t	.	1110664	0	0	0	deletion	NON CDS	Deletion in a non-coding region.
1579336	.	a	1579342	0	0	0	insertion	NON CDS	Insertion in a non-coding region.	Three consecutive insertions in this region.
1579336	.	a	1579343	0	0	0	insertion	NON CDS	Insertion in a non-coding region.	Three consecutive insertions in this region.
1579336	.	a	1579344	0	0	0	insertion	NON CDS	Insertion in a non-coding region.	Three consecutive insertions in this region.
1990941	.	g	1990950	0	0	0	insertion	NON CDS	Insertion in a non-coding region.
3005280	.	g	3005290	0	0	0	insertion	NON CDS	Insertion in a non-coding region.
3598951	c	.	3598960	0	0	0	deletion	NON CDS	Deletion in a non-coding region.
#	1	3211505	1	3211507	chr2	chr2
42342	.	c	42343	0	0	0	insertion	NON CDS	Insertion in a non-coding region.
406611	g	.	406611	0	0	0	deletion	K562_RS28815	Deletion in a methylamine utilization (mauD) CDS.
416843	.	a	416844	0	0	0	insertion	NON CDS	Insertion in a non-coding region.
616956	.	c	616958	0	0	0	insertion	NON CDS	Insertion in a non-coding region.
636602	t	.	636603	0	0	0	deletion	NON CDS	Deletion in a non-coding region.
1243832	.	c	1243834	0	0	0	insertion	K562_RS18055	Insertion in a malate:quinone oxidoreductase (mqo) CDS.
1272322	.	t	1272325	0	0	0	insertion	K562_RS18170	Insertion in a LysR family transcriptional regulator CDS.
1861150	a	g	1861153	0	0	0	substitution	K562_RS20940	Substitution in a LysR family transcriptional regulator CDS.	Two mutations in the same gene.
1861154	a	.	1861156	0	0	0	deletion	K562_RS20940	Deletion in a LysR family transcriptional regulator CDS.	Two mutations in the same gene.
#	1	769482	1	769482	chr3	chr3
119861	.	c	119862	0	0	0	insertion	K562_RS33215	Insertion in a autotransporter-associated beta strand repeat-containing protein CDS.
592894	a	.	592894	0	0	0	deletion	NON CDS	Deletion in a non-coding region.
#	1	92661	1	92661	mpl	mpl
21125	g	.	21124	0	0	0	deletion	K562_RS34965	Deletion in a conjugal transfer protein TraH CDS.
72778	.	c	72778	0	0	0	insertion	NON CDS	Insertion in a non-coding region.
#	1	5616	1	5616	pg	pg			No mutations detected.

## Sheet: dnaN
CRIPSRi dnaN mutant — SNP summary
#	1	3680459	1	3680463	chr1	chr1	Type	Locus affected	Effect/Consequence
863097	.	g	863098	0	0	0	insertion	NON CDS	Insertion in a non-coding region.
988284	.	c	988286	0	0	0	insertion	NON CDS	Insertion in a non-coding region.
1408215	g	.	1408216	0	0	0	deletion	NON CDS	Deletion in a non-coding region.
1415855	.	t	1415857	0	0	0	insertion	NON CDS	Insertion in a non-coding region.
1423331	.	c	1423334	0	0	0	insertion	K562_RS07970	Insertion in a ABC transporter ATP-binding protein CDS.
1520381	.	g	1520385	0	0	0	insertion	K562_RS07545	Insertion in a PAS domain S-box protein CDS.
2498115	.	a	2498120	0	0	0	insertion	NON CDS	Insertion in a non-coding region.
2680459	a	.	2680463	0	0	0	deletion	NON CDS	Deletion in a non-coding region.
2925503	t	g	2925507	0	0	0	substitution	K562_RS00935	Substitution in a site-specific integrase CDS.
#	1	3211505	1	3211509	chr2	chr2
909600	.	c	909601	0	0	0	insertion	NON CDS	Insertion in a non-coding region.
1284101	a	.	1284101	0	0	0	deletion	NON CDS	Deletion in a non-coding region.
1284611	.	g	1284612	0	0	0	insertion	K562_RS28860	Insertion in a porin CDS.
1678902	.	c	1678904	0	0	0	insertion	K562_RS30545	Insertion in a IS3-like element ISBcen9 family transposase CDS.
2057896	.	g	2057899	0	0	0	insertion	NON CDS	Insertion in a non-coding region.
2184236	.	g	2184240	0	0	0	insertion	NON CDS	Insertion in a non-coding region.
2485353	.	t	2485358	0	0	0	insertion	NON CDS	Insertion in a non-coding region.
2590515	c	.	2590519	0	0	0	deletion	K562_RS20285	Deletion in a ABC transporter ATP-binding protein CDS.
#	1	769483	1	769484	chr3	chr3
168684	.	t	168685	0	0	0	insertion	K562_RS32635	Insertion in a hypothetical protein.
#	1	92661	1	92661	mpl	mpl			No mutations detected.
#	1	5601	1	5601	pg	pg			No mutations detected.

## Sheet: gatB
CRISPRi gatB mutant — SNP summary
#	1	3680463	1	3680458	chr1	chr1	Type	Locus affected	Effect/Consequence
198720	a	.	198719	0	0	0	deletion	NON CDS	Deletion in a non-coding region.
626289	g	.	626287	0	0	0	deletion	NON CDS	Deletion in a non-coding region.
751478	c	.	751475	0	0	0	deletion	NON CDS	Deletion in a non-coding region.
1219960	c	.	1219956	0	0	0	deletion	K562_RS12695	Deletion in a UvrD-helicase domain-containing protein CDS.
1264358	.	g	1264355	0	0	0	insertion	K562_RS12890	Insertion in a IS66-like element ISBcen19 family transposase CDS.
1639001	c	.	1638997	0	0	0	deletion	NON CDS	Deletion in a non-coding region.
1640338	.	c	1640335	0	0	0	insertion	K562_RS14650	Insertion in a IS3-like element ISBcen9 family transposase CDS.
1676210	a	.	1676206	0	0	0	deletion	NON CDS	Deletion in a non-coding region.
2221648	g	.	2221643	0	0	0	deletion	K562_RS00230	Deletion in a IS3 family transposase CDS.
2391260	.	c	2391256	0	0	0	insertion	NON CDS	Insertion in a non-coding region.
2796922	t	.	2796917	0	0	0	deletion	NON CDS	Deletion in a non-coding region.
2796923	t	.	2796917	0	0	0	deletion	NON CDS	Deletion in a non-coding region.
3478540	g	c	3478534	0	0	0	substitution	K562_RS06160	Substitution in an ABC transporter permease subunit CDS.
3533007	.	c	3533002	0	0	0	insertion	K562_RS06450	Insertion in a IS3-like element ISBcen9 family transposase CDS.
#	1	3211504	1	3211506	chr2	chr2
483614	.	a	483615	0	0	0	insertion	K562_RS18435	Insertion in a pyridoxal-dependent decarboxylase, exosortase A system-associated CDS.
1191254	.	a	1191256	0	0	0	insertion	NON CDS	Insertion in a non-coding region.
1210904	.	g	1210907	0	0	0	insertion	NON CDS	Insertion in a non-coding region.
1410638	c	g	1410641	0	0	0	substitution	K562_RS28860	Substitution in a porin CDS.
1785515	.	g	1785519	0	0	0	insertion	NON CDS	Insertion in a non-coding region.
1811242	a	.	1811245	0	0	0	deletion	NON CDS	Deletion in a non-coding region.
1811243	g	.	1811245	0	0	0	deletion	NON CDS	Deletion in a non-coding region.
1837706	g	t	1837708	0	0	0	substitution	K562_RS26990	Substitution in a MexE family multidrug efflux RND transporter periplasmic adaptor subunit CDS.
#	1	769483	1	769483	chr3	chr3			No mutations detected.
#	1	92660	1	92662	mpl	mpl
36403	.	t	36404	0	0	0	insertion	NON CDS	Insertion in a non-coding region.
36403	.	a	36405	0	0	0	insertion	NON CDS	Insertion in a non-coding region.
#	1	5616	1	5616	pg	pg			No mutations detected.

## Sheet: gyrB
CRISPRi gyrB mutant — SNP summary
#	1	3680457	1	3680449	chr1	chr1	Type	Locus affected	Effect/Consequence
28407	.	a	28408	0	0	0	insertion	NON CDS	Insertion in a non-coding region.
578386	g	.	578386	0	0	0	deletion	NON CDS	Deletion in a non-coding region.
600877	.	c	600878	0	0	0	insertion	K562_RS10405	Insertion in a sugar/ribose ABC transporter ATP-binding protein CDS.
1437575	t	.	1437575	0	0	0	deletion	NON CDS	Deletion in a non-coding region.
1569759	c	.	1569758	0	0	0	deletion	NON CDS	Deletion in a non-coding region.
1669878	t	c	1669877	0	0	0	substitution	NON CDS	Substitution in a non-coding region.
1840337	g	c	1840336	0	0	0	substitution	K562_RS04725	Substituon in a hypothetical protein.
2213404	.	a	2213404	0	0	0	insertion	NON CDS	Insertion in a non-coding region.
2478971	g	.	2478970	0	0	0	deletion	K562_RS01770	Deletion in a type VI secretion system baseplate subunit TssK CDS.
2619065	g	.	2619063	0	0	0	deletion	NON CDS	Deletion in a non-coding region.
2640793	t	g	2640791	0	0	0	substitution	K562_RS00935	Substitution in a site-specific integrase CDS.
2681469	a	.	2681466	0	0	0	deletion	NON CDS	Deletion in a non-coding region.
2780453	t	.	2780449	0	0	0	deletion	K562_RS00260	Deletion in a ABC transporter substrate-binding protein CDS.
3044386	t	.	3044381	0	0	0	deletion	NON CDS	Deletion in a non-coding region.
3332290	g	.	3332284	0	0	0	deletion	K562_RS14875	Deletion in a MFS transporter CDS.
3408737	t	.	3408730	0	0	0	deletion	NON CDS	Deletion in a non-coding region.
3419001	t	.	3418993	0	0	0	deletion	NON CDS	Deletion in a non-coding region.
#	1	3211506	1	3211502	chr2	chr2
119735	c	g	119735	0	0	0	substitution	K562_RS28860	Substitution in a porin CDS.
120109	t	.	120108	0	0	0	deletion	NON CDS	Deletion in a non-coding region.
203893	g	.	203891	0	0	0	deletion	NON CDS	Deletion in a non-coding region.
494612	.	g	494611	0	0	0	insertion	NON CDS	Insertion in a non-coding region.
520339	a	.	520337	0	0	0	deletion	NON CDS	Deletion in a non-coding region.
520340	g	.	520337	0	0	0	deletion	NON CDS	Deletion in a non-coding region.
546803	g	t	546800	0	0	0	substitution	K562_RS26990	Substitution in a MexE family multidrug efflux RND transporter periplasmic adaptor subunit CDS.
1887315	t	c	1887312	0	0	0	substitution	K562_RS20940	Deletion in a LysR family transcriptional regulator CDS.
2371874	c	.	2371870	0	0	0	deletion	K562_RS18630	Deletion in a hypothetical protein.
2398107	t	.	2398102	0	0	0	deletion	K562_RS18470	Deletion in a 3-oxoacyl-ACP synthase CDS.
2504633	.	g	2504629	0	0	0	insertion	K562_RS18055	Insertion in a malate:quinone oxidoreductase (mqo) CDS.
2557821	c	.	2557816	0	0	0	deletion	NON CDS	Deletion in a non-coding region.
2719042	a	.	2719036	0	0	0	deletion	NON CDS	Deletion in a non-coding region.
3111857	.	a	3111852	0	0	0	insertion	NON CDS	Insertion in a non-coding region.
3131507	.	g	3131503	0	0	0	insertion	NON CDS	Insertion in a non-coding region.
#	1	769482	1	769481	chr3	chr3
522067	c	.	522066	0	0	0	deletion	K562_RS31725	Deletion in a IS3 family transposase CDS.
719484	c	.	719482	0	0	0	deletion	NON CDS	Deletion in a non-coding region.
767658	.	a	767657	0	0	0	insertion	NON CDS	Deletion in a non-coding region.
#	1	92661	1	92661	mpl	mpl			No mutations detected.
#	4144	5602	1	1459	pg	pg			No mutations detected.

## Sheet: NTC
CRISPRi NTC mutant — SNP summary
#	1	3680458	1	3680457	chr1	chr1	Type	Locus affected	Effect/Consequence
279212	g	.	279211	0	0	0	deletion	NON CDS	Deletion in a non-coding region.
286852	.	t	286852	0	0	0	insertion	NON CDS	Insertion in a non-coding region.
294329	c	.	294328	0	0	0	deletion	K562_RS07970	Deletion in a ABC transporter ATP-binding protein CDS.
805039	c	.	805037	0	0	0	deletion	K562_RS05590	Deletion in a L-aspartate oxidase (nadB) CDS.
1369113	.	a	1369112	0	0	0	insertion	NON CDS	Insertion in a non-coding region.
1369113	.	a	1369113	0	0	0	insertion	NON CDS	Insertion in a non-coding region.
1796500	g	t	1796500	0	0	0	substitution	K562_RS00935	Substitution in a site-specific integrase CDS.
1944384	.	c	1944385	0	0	0	insertion	K562_RS00230	Insertion in a IS3 family transposase CDS.
2164718	c	.	2164718	0	0	0	deletion	NON CDS	Deletion in a non-coding region.
2564065	g	a	2564065	0	0	0	substitution	NON CDS	Substitution downstream dCas9 coding region, gene unaffected.
2564132	t	.	2564131	0	0	0	deletion	NON CDS	Deletion downstream dCas9 coding region, gene unaffected.
2564133	a	.	2564131	0	0	0	deletion	NON CDS	Deletion downstream dCas9 coding region, gene unaffected.
2564136	a	.	2564133	0	0	0	deletion	NON CDS	Deletion downstream dCas9 coding region, gene unaffected.
2574709	.	t	2574707	0	0	0	insertion	NON CDS	Insertion in a non-coding region.
3414551	.	g	3414550	0	0	0	insertion	NON CDS	Insertion in a non-coding region.
#	1	3211507	1	3211507	chr2	chr2
198806	.	c	198807	0	0	0	insertion	K562_RS28860	Insertion in a porin CDS.
198936	c	g	198937	0	0	0	substitution	K562_RS28860	Substitution in a porin CDS.
1966511	.	t	1966513	0	0	0	insertion	K562_RS20940	Insertion in a LysR family transcriptional regulator CDS.
2451074	c	.	2451075	0	0	0	deletion	K562_RS18630	Deletion in a hypothetical protein.
3210708	g	.	3210708	0	0	0	deletion	NON CDS	Deletion in a non-coding region.
#	1	769483	1	769482	chr3	chr3
472129	g	.	472128	0	0	0	deletion	K562_RS33215	Deletion in a ABC transporter ATP-binding protein CDS.
#	1	92661	1	92661	mpl	mpl
21125	g	.	21124	0	0	0	deletion	K562_RS34965	Deletion in a conjugal transfer protein TraH CDS.
72778	.	c	72778	0	0	0	insertion	NON CDS	Insertion in a non-coding region.
#	1	5601	1	5600	pg	pg
1770	g	.	1769	0	0	0	deletion	dhfrIIb	Deletion in a dihydrofolate reductase CDS (confers resistance to trimethoprim).
1998	.	c	1998	0	0	0	insertion	NON CDS	Insertion in a non-coding region.
2103	c	.	2102	0	0	0	deletion	NON CDS	Deletion in a non-coding region.
3519	c	.	3517	0	0	0	deletion	NON CDS	Deletion in a non-coding region.
4259	.	t	4258	0	0	0	insertion	NON CDS	Deletion in a non-coding region.

## Sheet: Other info
Overall mutation counts (all mutants combined)
Mutation type	Count	Percentage
Insertions	55	0.4583
Deletions	49	0.4083
Substitutions	16	0.1333
Distribution across chromosomes (all mutants)
Chromosome	Count	Percentage
chr1	66	0.55
chr2	47	0.3917
chr3	7	0.0583
chr1 (66 total)
Insertions: 27
Deletions: 37
Substitutions: 12
chr2 (47 total)
Insertions: 21
Deletions: 26
Substitutions: 10
chr3 (7 total)
Insertions: 5
Deletions: 2
Substitutions: 0
