# Supplementary material
Source: Research Square preprint supplement (doi:10.21203/rs.3.rs-9728301/v1)
Supplement: Supplementary file 2 [file 6f4c00341a04e7d11c935cc1.xlsx]

## Sheet: unique relative to NTC
UNIQUE mutations relative to evolved NTC control — SNP summary
Mutant	#	Ref	Qry	#	Type	Locus affected	coding product	mutation
atpB	2251704	c	.	2251701	deletion	K562_RS04280	deacetylase family protein.	deletion causing a frameshift with early termination
atpB	2439077	.	g	2439075	insertion	K562_RS03415	biotin synthase (BioB)	insertion in an intergenic region
atpB	671195	.	c	671196	insertion	K562_RS31725	IS3 family transposase	insertion causing a frameshift affecting the stop codon
dcw	406611	g	.	406611	deletion	K562_RS28815	methylamine utilization (MauD)	deletion causing a frameshift affecting the stop codon
dcw	1243832	.	c	1243834	insertion	K562_RS18055	malate:quinone oxidoreductase (Mqo)	insertion upstream of the start codon
dcw	1272322	.	t	1272325	insertion	K562_RS18170	LysR family transcriptional regulator	insertion causing a frameshift affecting the stop codon
dnaN	1520381	.	g	1520385	insertion	K562_RS07545	PAS domain S-box protein	insertion causing a frameshift affecting the stop codon
dnaN	1678902	.	c	1678904	insertion	K562_RS30545	IS3-like element ISBcen9 family transposase	frameshift causing early termination
dnaN	2590515	c	.	2590519	deletion	K562_RS20285	ABC transporter ATP-binding protein	deletion causing a frameshift affecting the stop codon
dnaN	168684	.	t	168685	insertion	K562_RS32650	Insertion in a hypothetical protein.	frameshift affecting reading frame
gatB	1219960	c	.	1219956	deletion	K562_RS12695	UvrD-helicase domain-containing protein	deletion causing a frameshift affecting the stop codon
gatB	1264358	.	g	1264355	insertion	K562_RS12890	IS66-like element ISBcen19 family transposase	insertion causing frameshift and early termination
gatB	1640338	.	c	1640335	insertion	K562_RS14650	Insertion in a IS3-like element ISBcen9 family transposase	frameshift causing early termination
gatB	3478540	g	c	3478534	substitution	K562_RS06160	ABC transporter permease subunit
gatB	3533007	.	c	3533002	insertion	K562_RS06450	IS3-like element ISBcen9 family transposase	substition causing amino acid change Ser to Trp
gatB	483614	.	a	483615	insertion	K562_RS18435	pyridoxal-dependent decarboxylase, exosortase A system-associated protein	insertion causing frameshift and early termination
gatB	1837706	g	t	1837708	substitution	K562_RS26990	MexE family multidrug efflux RND transporter periplasmic adaptor subunit	substitution causing amino acid change His to Gln
gyrB	600877	.	c	600878	insertion	K562_RS10405	sugar/ribose ABC transporter ATP-binding protein	insertion causing a frameshift affecting the stop codon
gyrB	1840337	g	c	1840336	substitution	K562_RS04725	hypothetical protein.	substitution causing amino acid change Glu to Gln
gyrB	2478971	g	.	2478970	deletion	K562_RS01770	type VI secretion system baseplate subunit TssK	deletion causing frameshift and early termination
gyrB	2780453	t	.	2780449	deletion	K562_RS00260	ABC transporter substrate-binding protein	deletion causing frameshift and early termination
gyrB	3332290	g	.	3332284	deletion	K562_RS14875	MFS transporter	deletion causing a frameshift affecting the stop codon
gyrB	546803	g	t	546800	substitution	K562_RS26990	MexE family multidrug efflux RND transporter periplasmic adaptor subunit	substitution causing amino acid change His to Gln
gyrB	2398107	t	.	2398102	deletion	K562_RS18470	3-oxoacyl-ACP synthase CDS.	deletion causing frameshift and early termination
gyrB	2504633	.	g	2504629	insertion	K562_RS18055	malate:quinone oxidoreductase (Mqo)	insertion upstraeam of start codon
gyrB	522067	c	.	522066	deletion	K562_RS31725	IS3 family transposase	deletion causing frameshift affecting the stop codon

## Sheet: unique relative to NTC and WT
UNIQUE mutations relative to evolved NTC control and wild type — SNP summary
Mutant	#	Ref	Qry	#	Type	Locus affected	coding product	mutation	Notes
dcw	1243832	.	c	1243834	insertion	K562_RS18055	malate:quinone oxidoreductase (Mqo)	insertion upstream of the start codon
dnaN	168684	.	t	168685	insertion	K562_RS32650	Insertion in a hypothetical protein.	frameshift affecting reading frame
gatB	1264358	.	g	1264355	insertion	K562_RS12890	IS66-like element ISBcen19 family transposase	insertion causing frameshift and early termination
gyrB	600877	.	c	600878	insertion	K562_RS10405	sugar/ribose ABC transporter ATP-binding protein	insertion causing a frameshift affecting the stop codon
gyrB	2478971	g	.	2478970	deletion	K562_RS01770	type VI secretion system baseplate subunit TssK	deletion causing frameshift and early termination
gyrB	2780453	t	.	2780449	deletion	K562_RS00260	ABC transporter substrate-binding protein	deletion causing frameshift and early termination
gyrB	2398107	t	.	2398102	deletion	K562_RS18470	3-oxoacyl-ACP synthase	deletion causing frameshift and early termination
gyrB	2504633	.	g	2504629	insertion	K562_RS18055	malate:quinone oxidoreductase Mqo	insertion upstraeam of start codon
gyrB	522067	c	.	522066	deletion	K562_RS31725	IS3 family transposase	deletion causing frameshift affecting the stop codon
