# Supplementary material
Source: Research Square preprint supplement (doi:10.21203/rs.3.rs-9728301/v1)
Supplement: Supplementary file 3 [file 74ccae334d3a99914109cd4f.docx]

**CRISPRi loss-of-function mutations revealed through experimental evolution in *Burkholderia cenocepacia***

Zayra Batun1, Erick Arroyo-Pérez2, A.S.M. Zisanur Rahman1, Marike Palmer1, Andrew M. Hogan1, Sion Yi1, Yves Brun2 and Silvia T. Cardona1, 3*.

1 Department of Microbiology, University of Manitoba, Winnipeg, MB, Canada.

2 Department of Microbiology and Immunology, University of Montreal, Montreal, Canada.

3 Department of Medical Microbiology & Infectious Disease, University of Manitoba, Winnipeg, Canada.

*To whom correspondence should be addressed:  silvia.cardona@umanitoba.ca

**Supplementary Material**


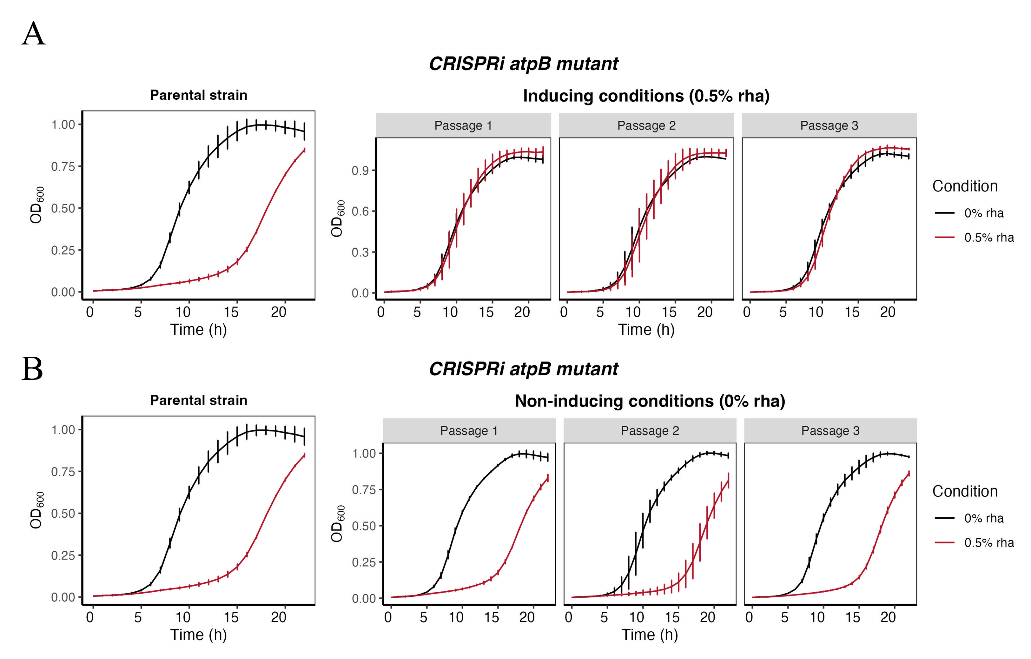


Supplementary Figure 1. Short-term evolution experiment for CRISPRi *atpB* mutant under dCas9-inducing and non-inducing conditions. (A) CGP loss is observed under consistent dCas9-inducing conditions after one bacterial passage. (B) CGP is maintained across bacterial passages under non-inducing conditions. Error bars represent the SD ± mean of three independent biological replicates.


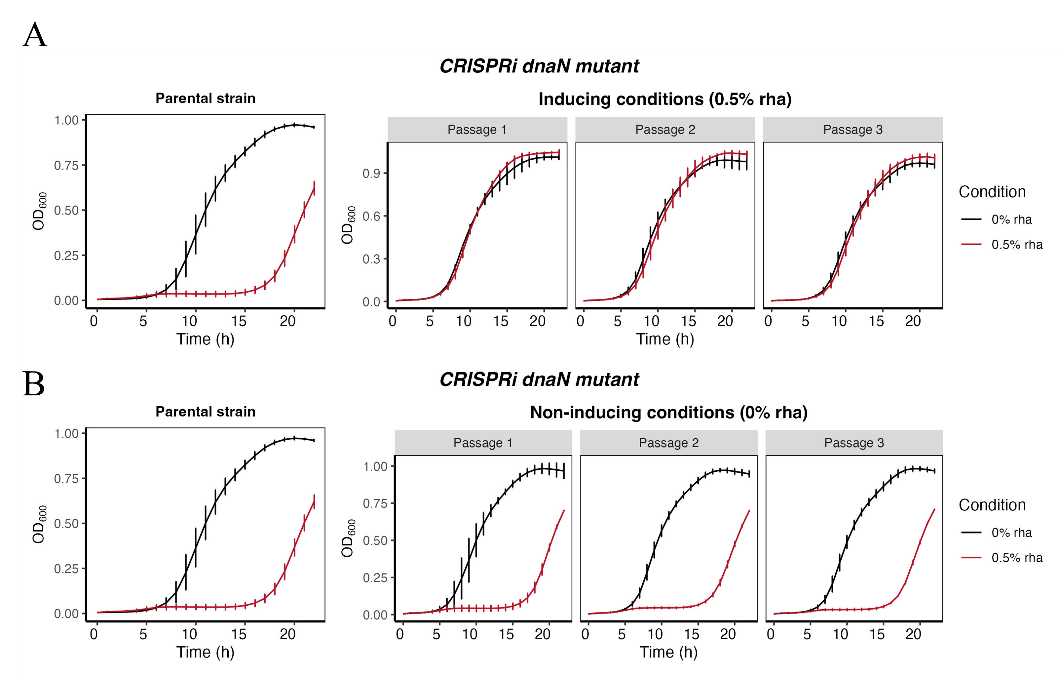


Supplementary Figure 1. Short-term evolution experiment for CRISPRi *dnaN* mutant under dCas9-inducing and non-inducing conditions. (A) CGP loss is observed under consistent dCas9-inducing conditions after one bacterial passage. (B) CGP is maintained across bacterial passages under non-inducing conditions. Error bars represent the SD ± mean of three independent biological replicates.


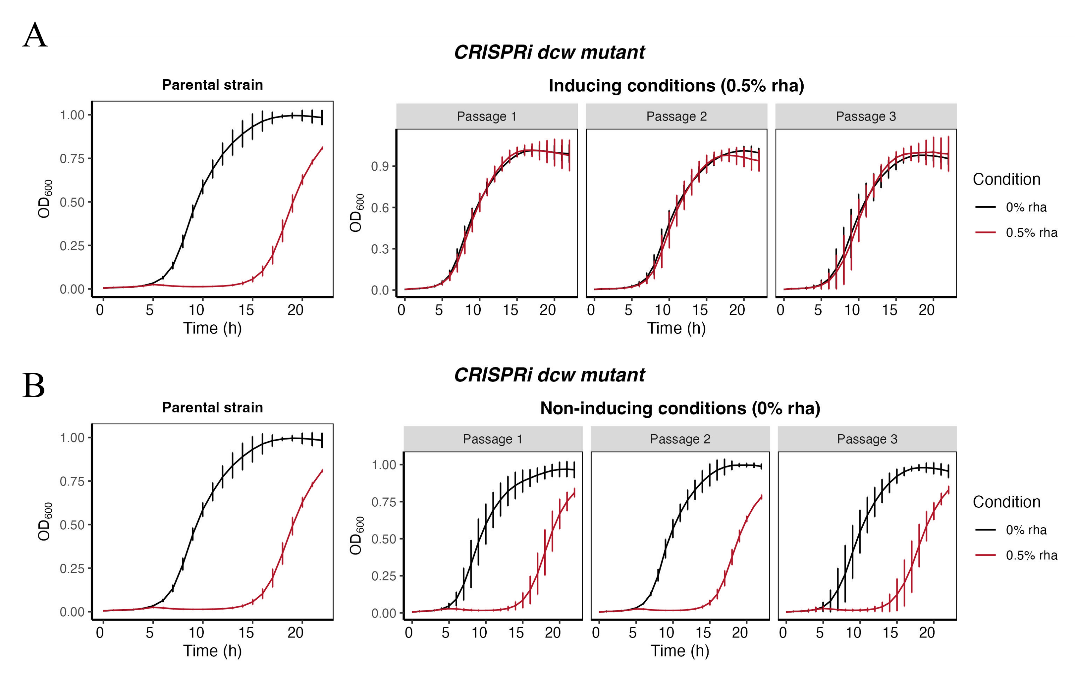


Supplementary Figure 2. Short-term evolution experiment for CRISPRi *dcw* mutant under dCas9-inducing and non-inducing conditions. (A) CGP loss is observed under consistent dCas9-inducing conditions after one bacterial passage. (B) CGP is maintained across bacterial passages under non-inducing conditions. Error bars represent the SD ± mean of three independent biological replicates.


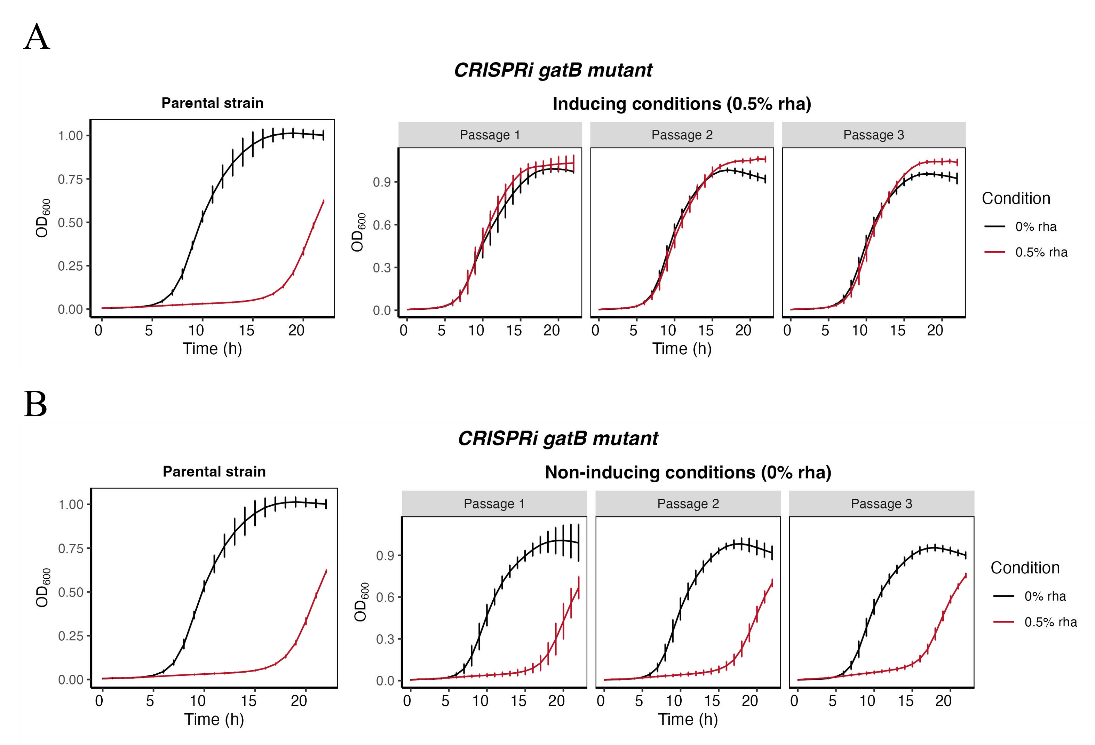


Supplementary Figure 3. Short-term evolution experiment for CRISPRi *gatB* mutant under dCas9-inducing and non-inducing conditions. (A) CGP loss is observed under consistent dCas9-inducing conditions after one bacterial passage. (B) CGP is maintained across bacterial passages under non-inducing conditions. Error bars represent the SD ± mean of three independent biological replicates.

**
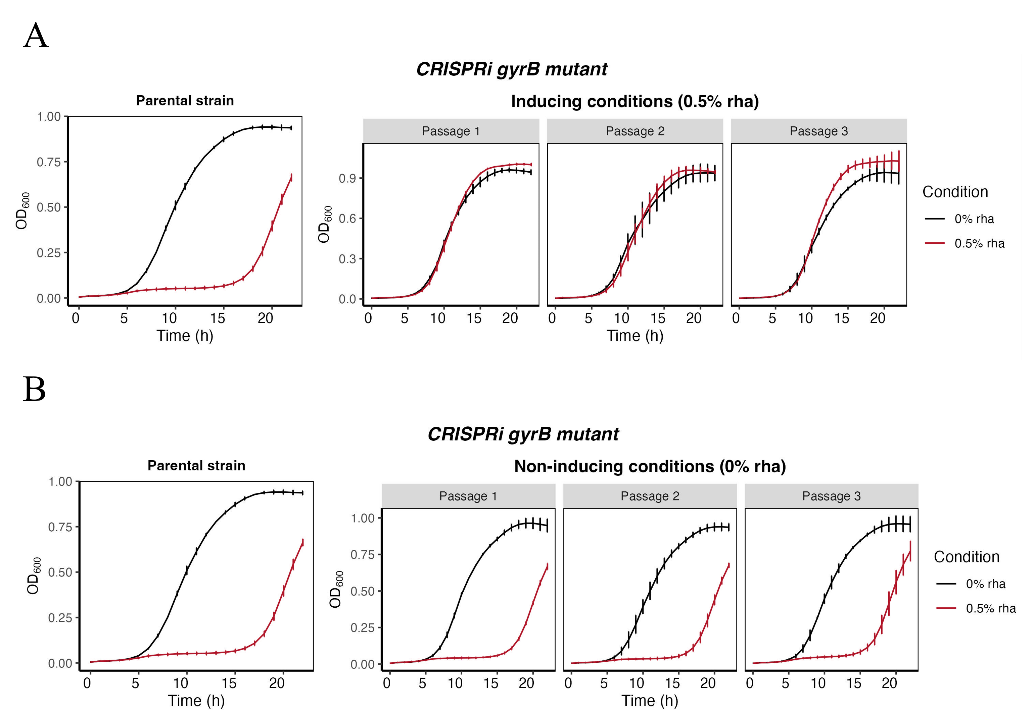
**

Supplementary Figure 4. Short-term evolution experiment for CRISPRi *gyrB* mutant under dCas9-inducing and non-inducing conditions. (A) CGP loss is observed under consistent dCas9-inducing conditions after one bacterial passage. (B) CGP is maintained across bacterial passages under non-inducing conditions. Error bars represent the SD ± mean of three independent biological replicates.

1.
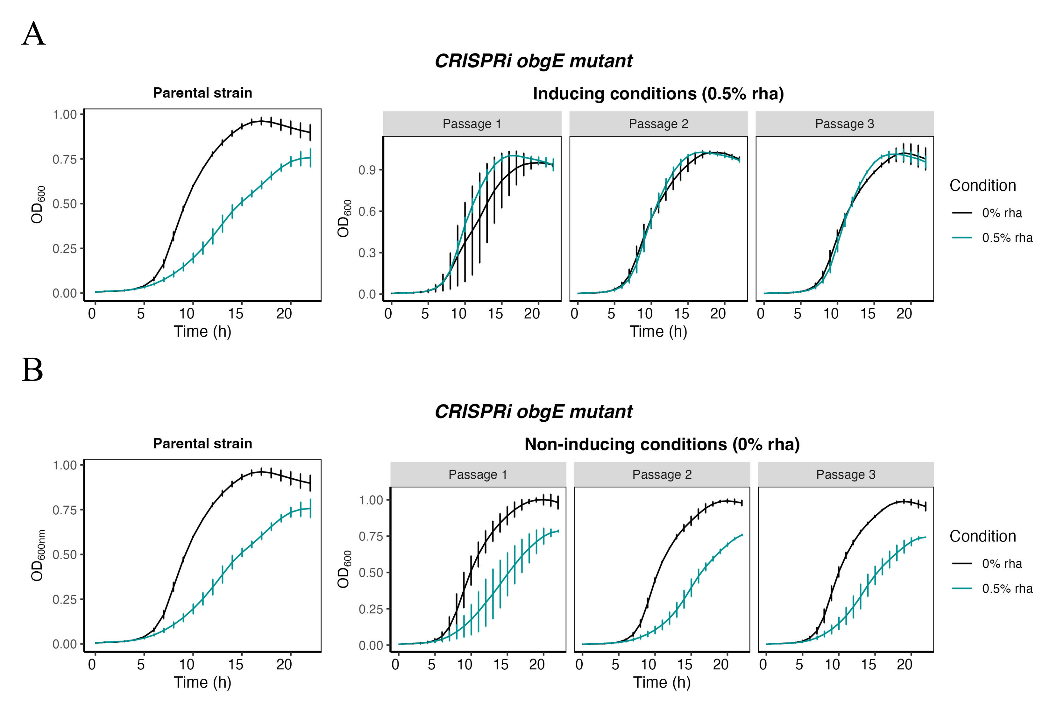


Supplementary Figure 6. Short-term evolution experiment for CRISPRi *obgE* mutant under dCas9-inducing and non-inducing conditions. (A) CGP loss is observed under consistent dCas9-inducing conditions after one bacterial passage. (B) CGP is maintained across bacterial passages under non-inducing conditions. Error bars represent the SD ± mean of three independent biological replicates.

**
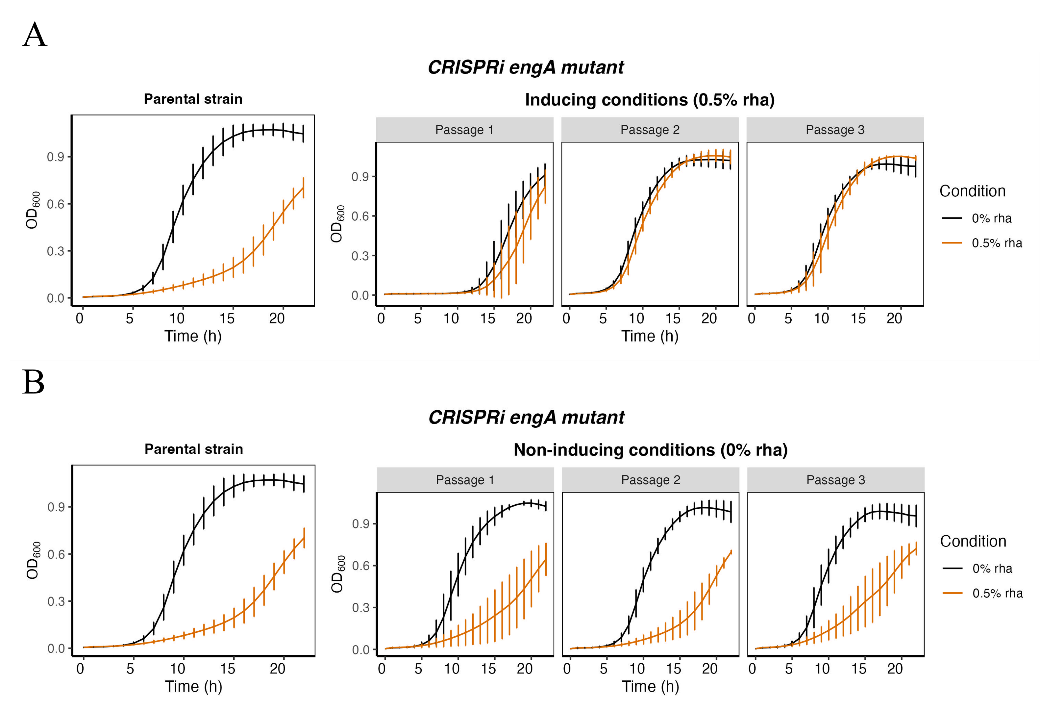
**

**Supplementary Figure 7.** Short-term evolution experiment for CRISPRi *engA* mutant under dCas9-inducing and non-inducing conditions. (A) CGP loss is observed under consistent dCas9-inducing conditions after two bacterial passages. (B) CGP is maintained across bacterial passages under non-inducing conditions. Error bars represent the SD ± mean of three independent biological replicates.


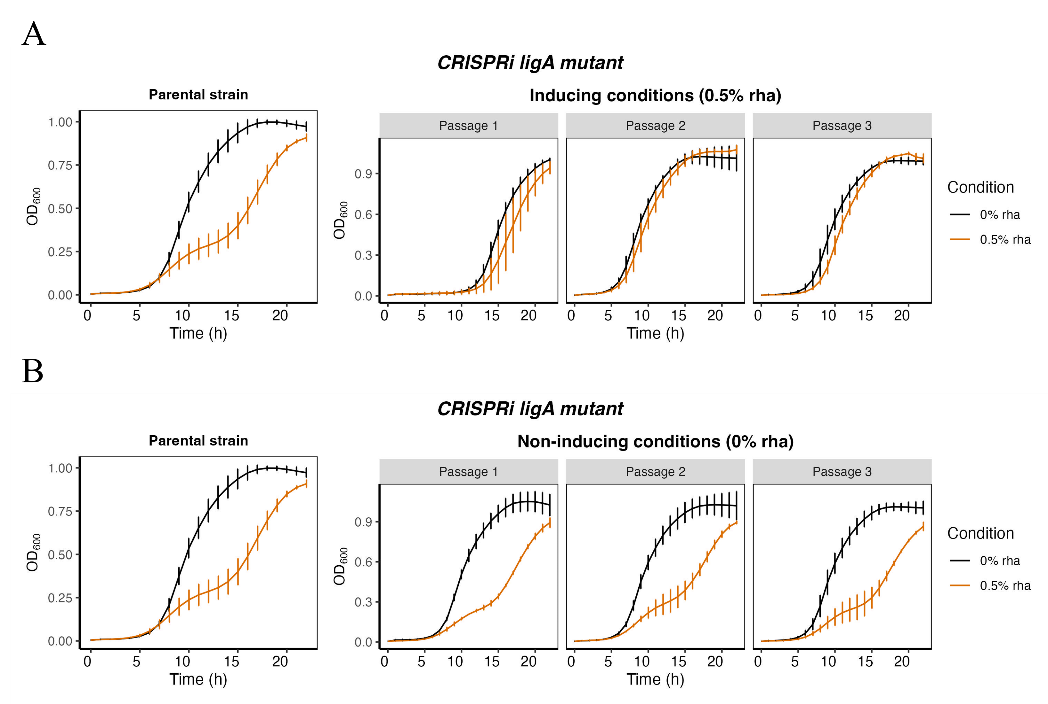


**Supplementary Figure 8.** Short-term evolution experiment for CRISPRi *ligA* mutant under dCas9-inducing and non-inducing conditions. (A) CGP loss is observed under consistent dCas9-inducing conditions after two bacterial passages. (B) CGP is maintained across bacterial passages under non-inducing conditions. Error bars represent the SD ± mean of three independent biological replicates.


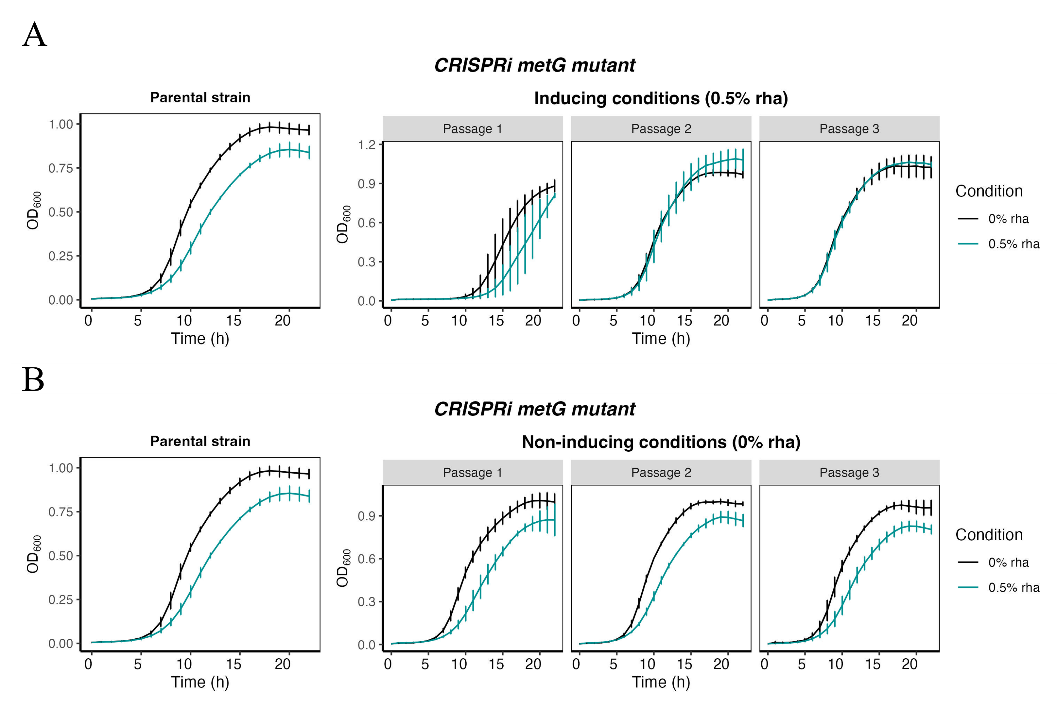


Supplementary Figure 9. Short-term evolution experiment for CRISPRi *metG* mutant under dCas9-inducing and non-inducing conditions. CGP loss is observed under consistent dCas9-inducing conditions after two bacterial passages. (B) CGP is maintained across bacterial passages under non-inducing conditions. Error bars represent the SD ± mean of three independent biological replicates.


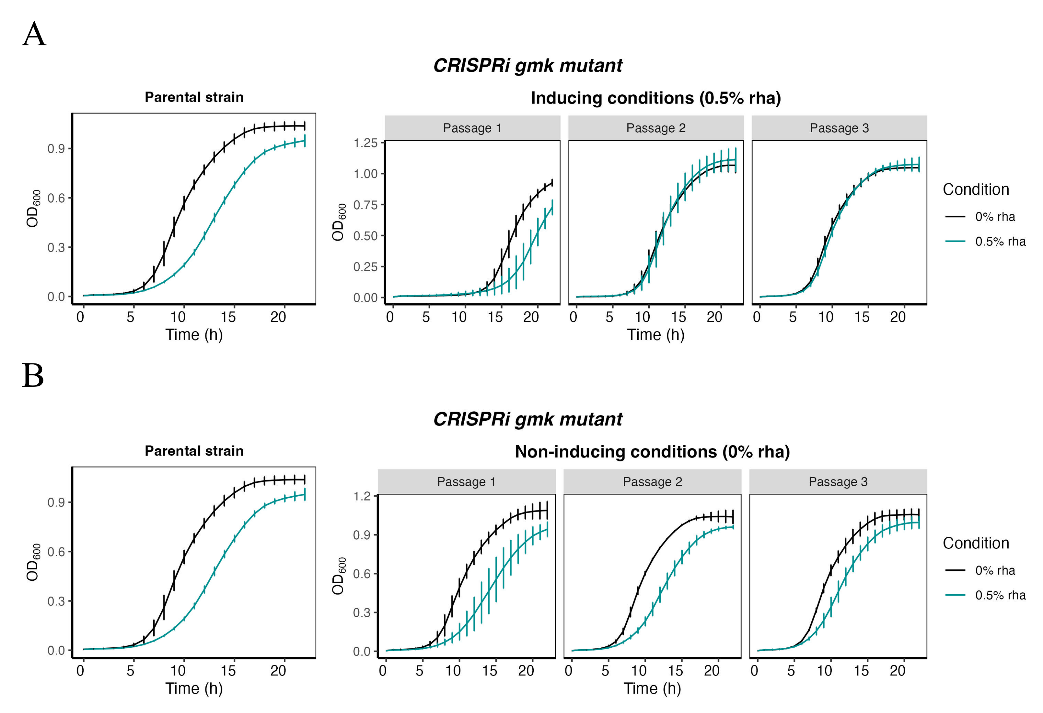


Supplementary Figure 10. Short-term evolution experiment for CRISPRi *gmk* mutant under dCas9-inducing and non-inducing conditions. (A) CGP loss is observed under consistent dCas9-inducing conditions after two bacterial passages. (B) CGP is maintained across bacterial passages under non-inducing conditions. Error bars represent the SD ± mean of three independent biological replicates.


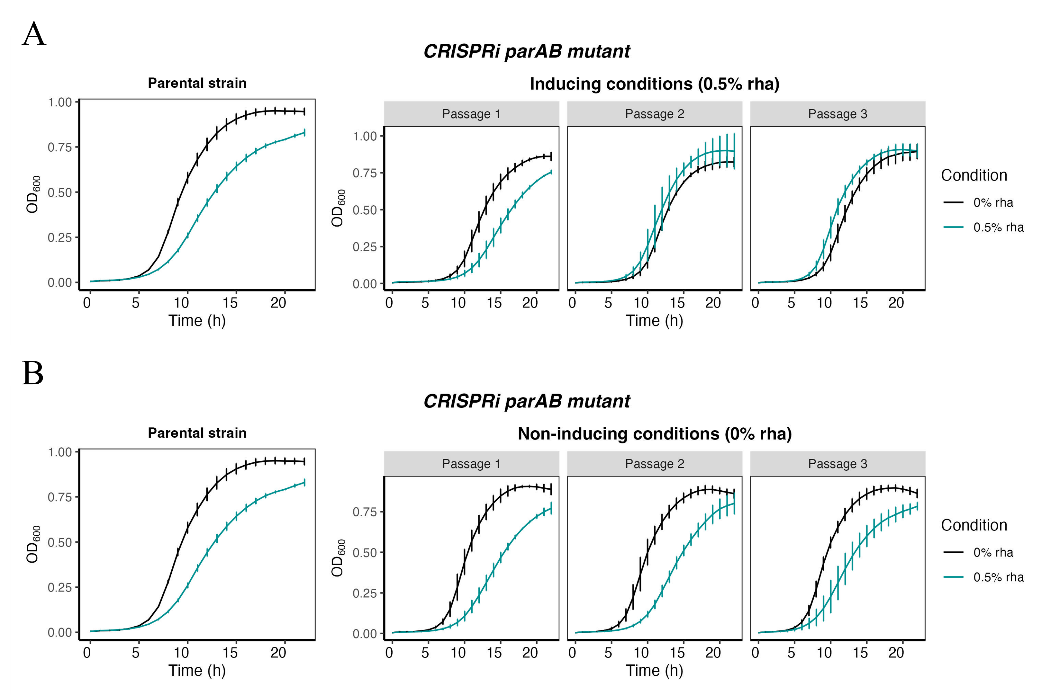


Supplementary Figure 11. Short-term evolution experiment for CRISPRi *parAB* mutant under dCas9-inducing and non-inducing conditions. (A) CGP loss is observed under consistent dCas9-inducing conditions after two bacterial passages. (B) CGP is maintained across bacterial passages under non-inducing conditions. Error bars represent the SD ± mean of three independent biological replicates.


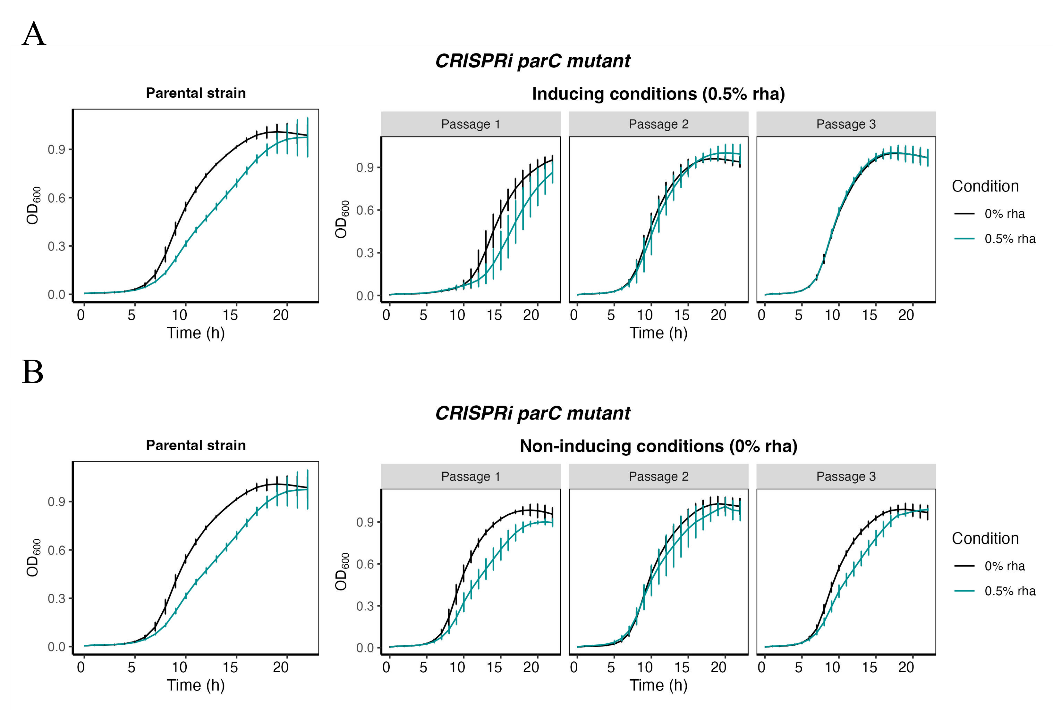


Supplementary Figure 12. Short-term evolution experiment for CRISPRi *parC* mutant under dCas9-inducing and non-inducing conditions. (A) CGP loss is observed under consistent dCas9-inducing conditions after two bacterial passages. (B) CGP is maintained across bacterial passages under non-inducing conditions. Error bars represent the SD ± mean of three independent biological replicates.


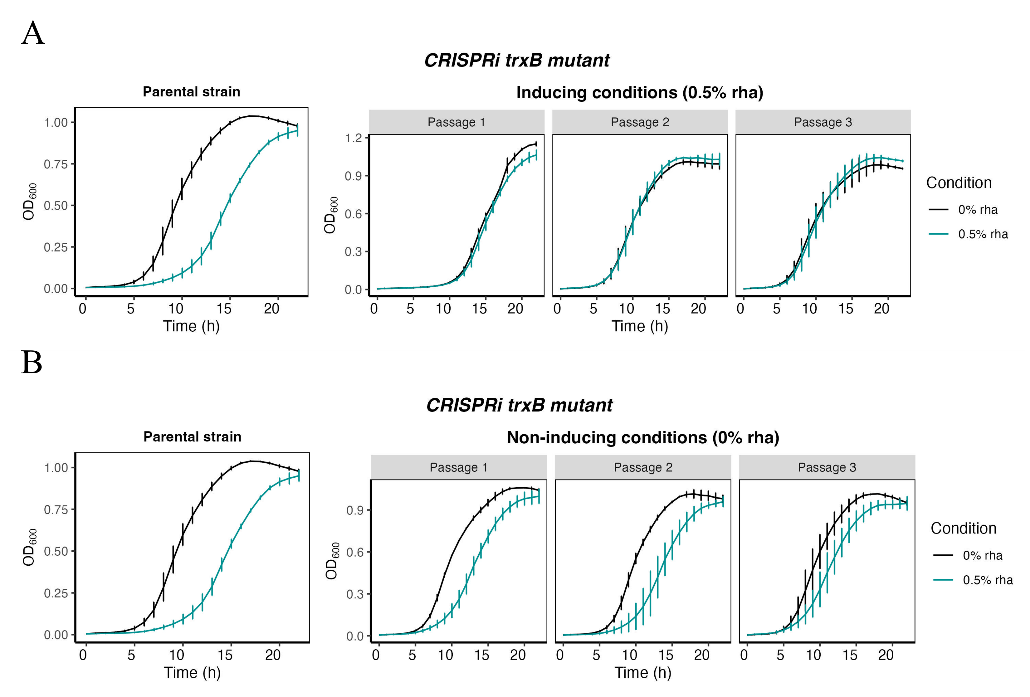


Supplementary Figure 13. Short-term evolution experiment for CRISPRi *trxB* mutant under dCas9-inducing and non-inducing conditions. (A) CGP loss is observed under consistent dCas9-inducing conditions after three bacterial passages. (B) CGP is maintained across bacterial passages under non-inducing conditions. Error bars represent the SD ± mean of three independent biological replicates.

**
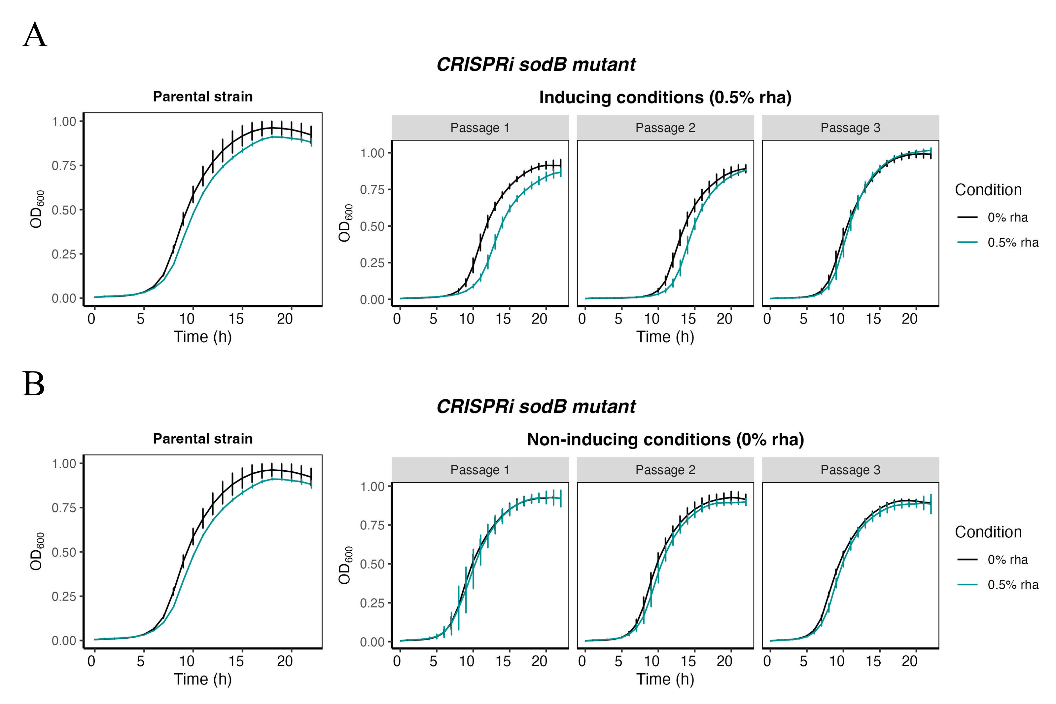
**

Supplementary Figure 14. Short-term evolution experiment for CRISPRi *sodB* mutant under dCas9-inducing and non-inducing conditions. (A) CGP loss is observed under consistent dCas9-inducing conditions after three bacterial passages. (B) CGP is maintained across bacterial passages under non-inducing conditions. Error bars represent the SD ± mean of three independent biological replicates.


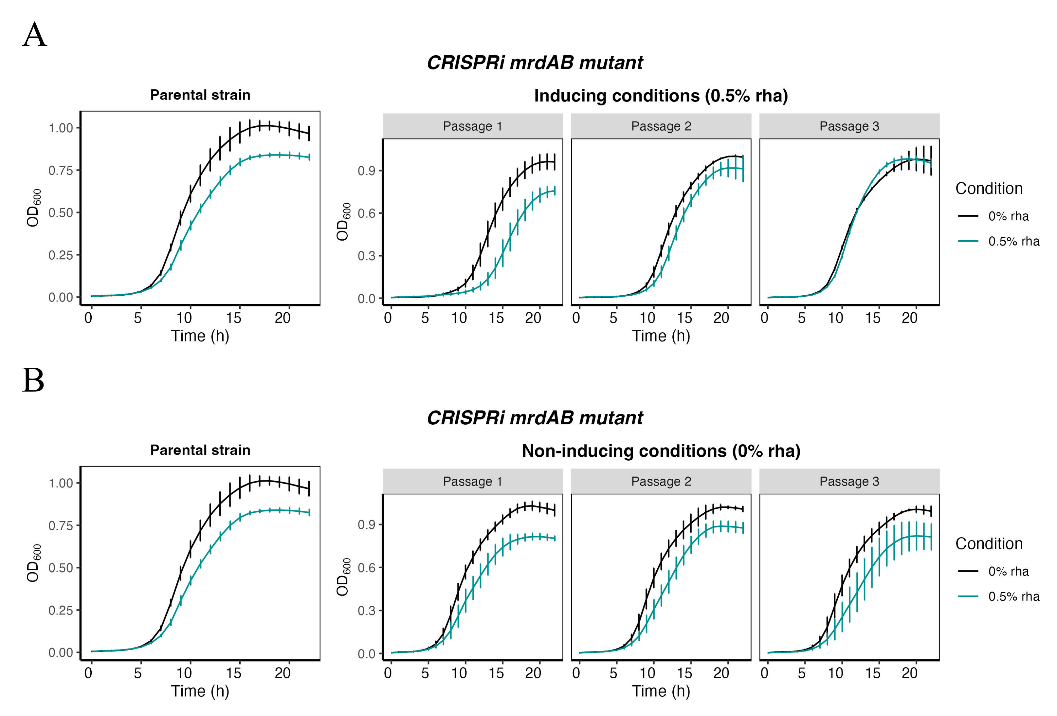


Supplementary Figure 15. Short-term evolution experiment for CRISPRi *mrdAB* mutant under dCas9-inducing and non-inducing conditions. (A) CGP loss is observed under consistent dCas9-inducing conditions after three bacterial passages. (B) CGP is maintained across bacterial passages under non-inducing conditions. Error bars represent the SD ± mean of three independent biological replicates.


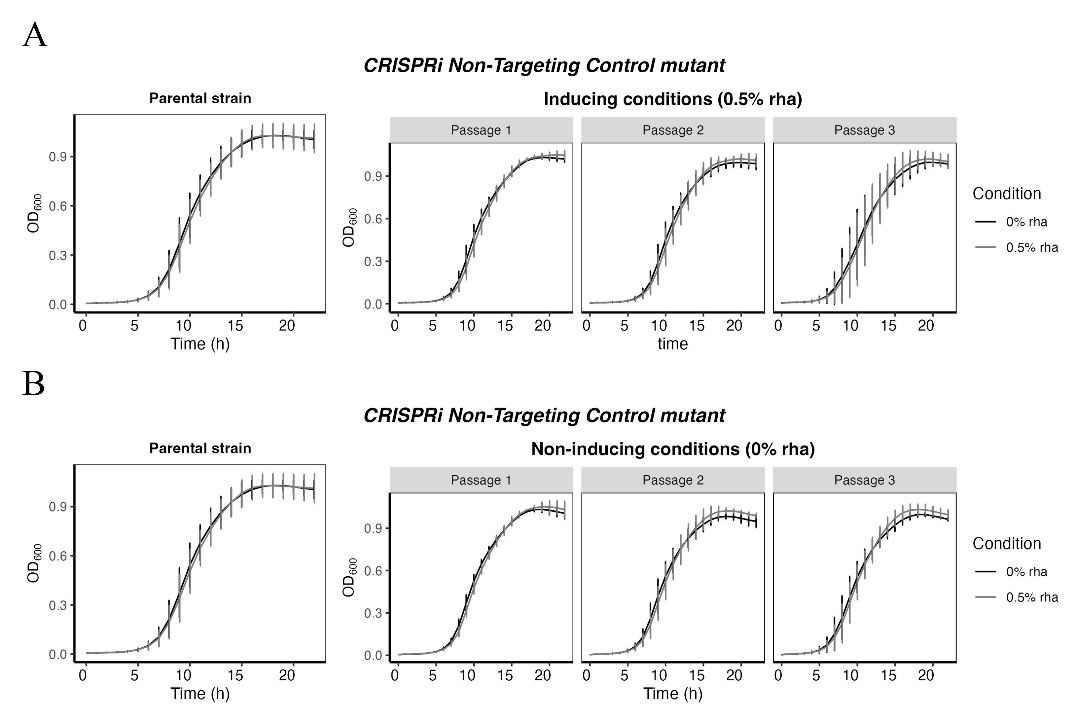


Supplementary Figure 16. Short-term evolution experiment for CRISPRi NTCmutant under dCas9-inducing and non-inducing conditions. (A-B) Growth is equivalent under consistent dCas9-inducing and non-inducing conditions after three bacterial passages with no CGP detected. Error bars represent the SD ± mean of three independent biological replicates.

**
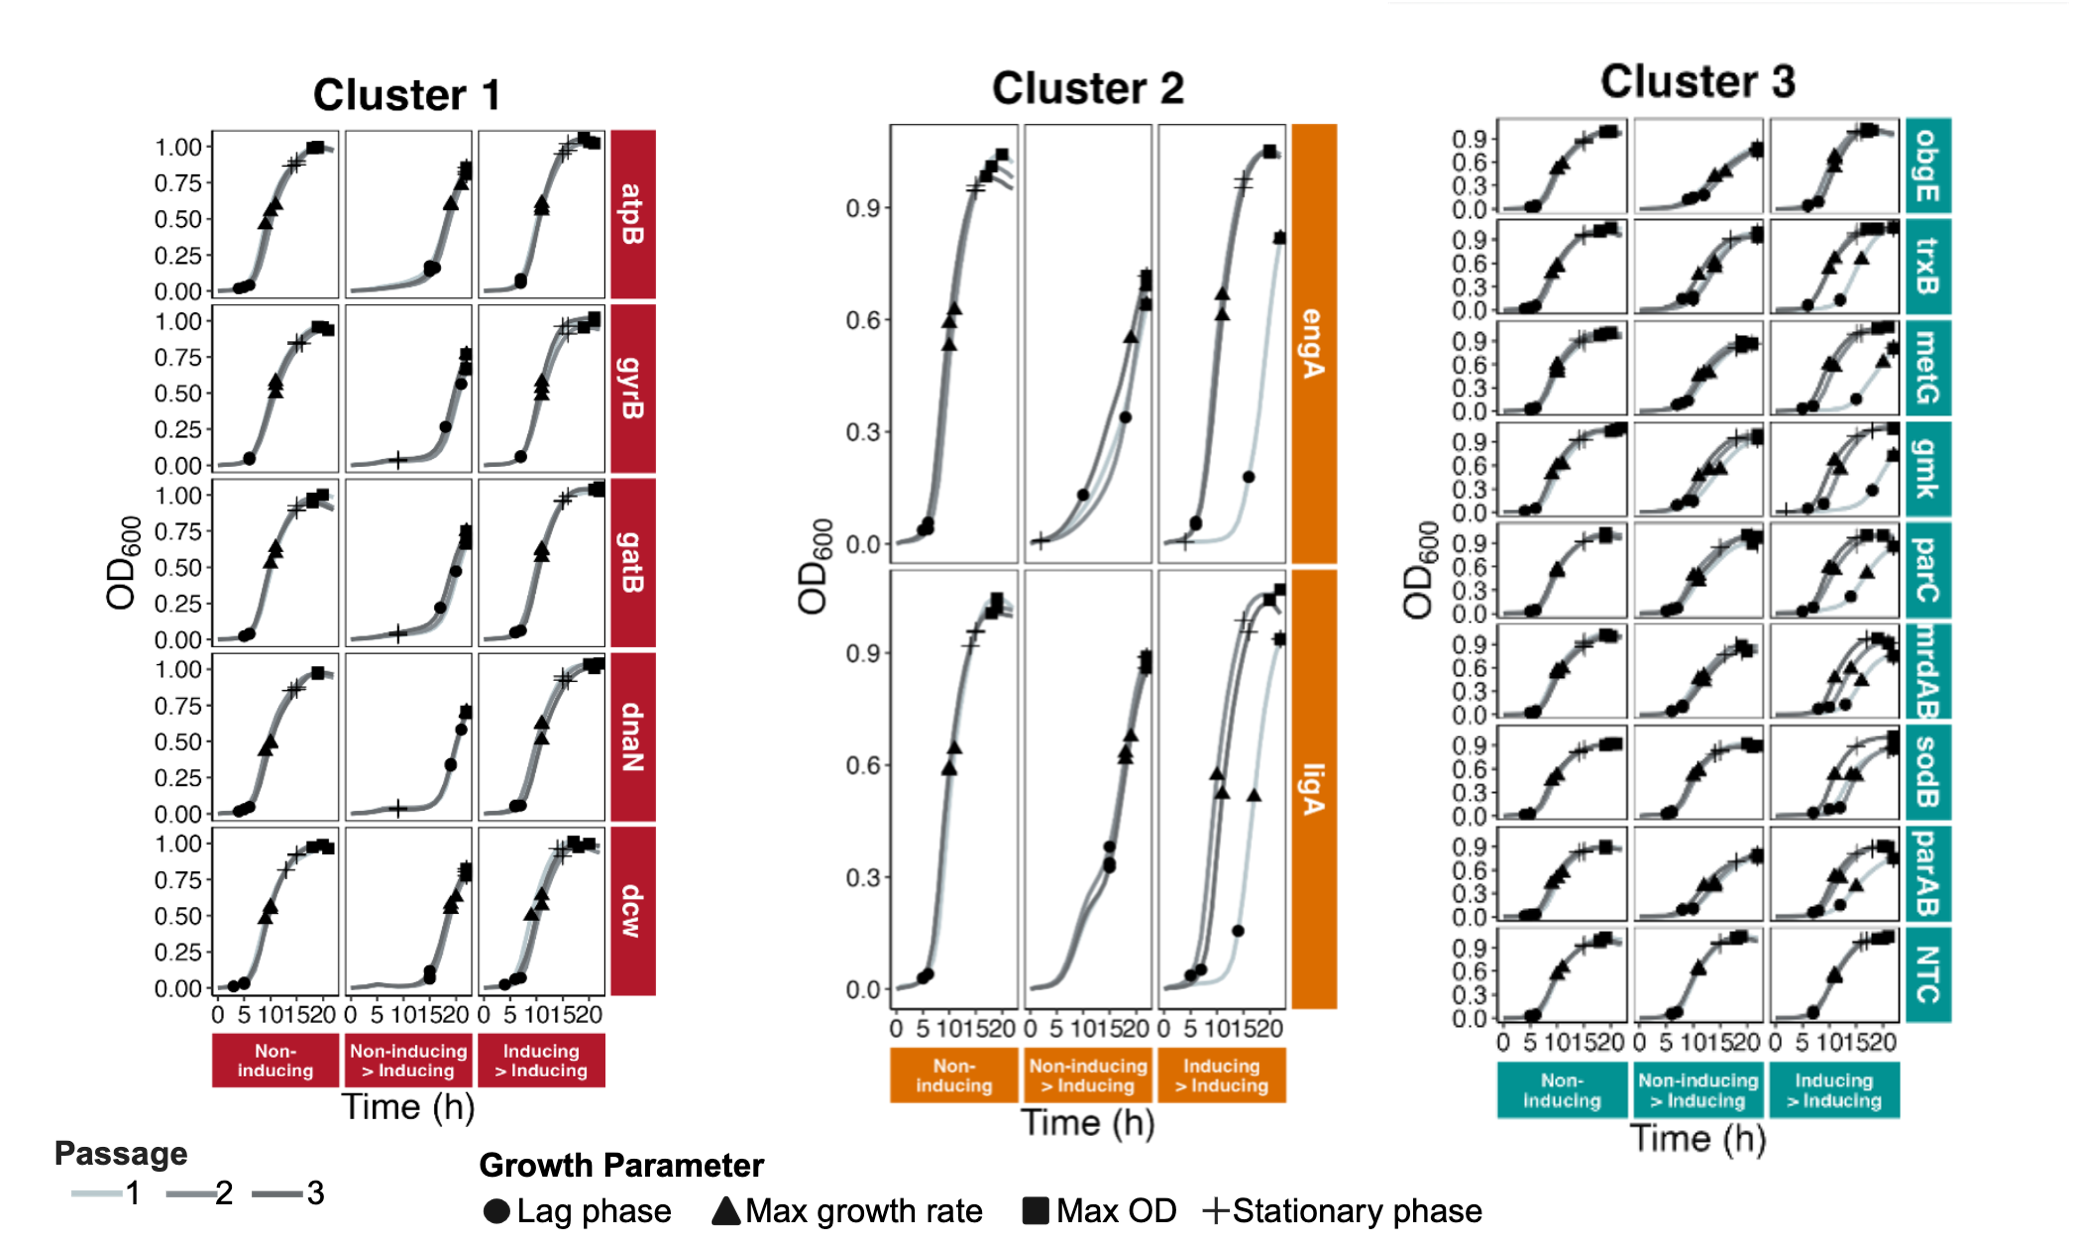
**

**Supplementary Figure 17**. Growth curves of CRISPRi mutants organized by cluster under dCas9-inducing and non-inducing conditions. Cluster 1, 2, and Cluster 3 mutants are shown as individual panels. Within each panel, genes are displayed as rows and conditions as columns: non-inducing throughout (left), non-inducing conditions overnight followed by induction (middle), and dCas9-inducing conditions overnight (right). Lines represent growth curves across three passages shown on a grey scale (light to dark; passages 1–3). Cluster 1 mutants display severe conditional growth phenotypes (CGPs), Cluster 2 mutants display intermediate CGPs, and Cluster 3 mutants display mild CGPs upon consistent dCas9 induction


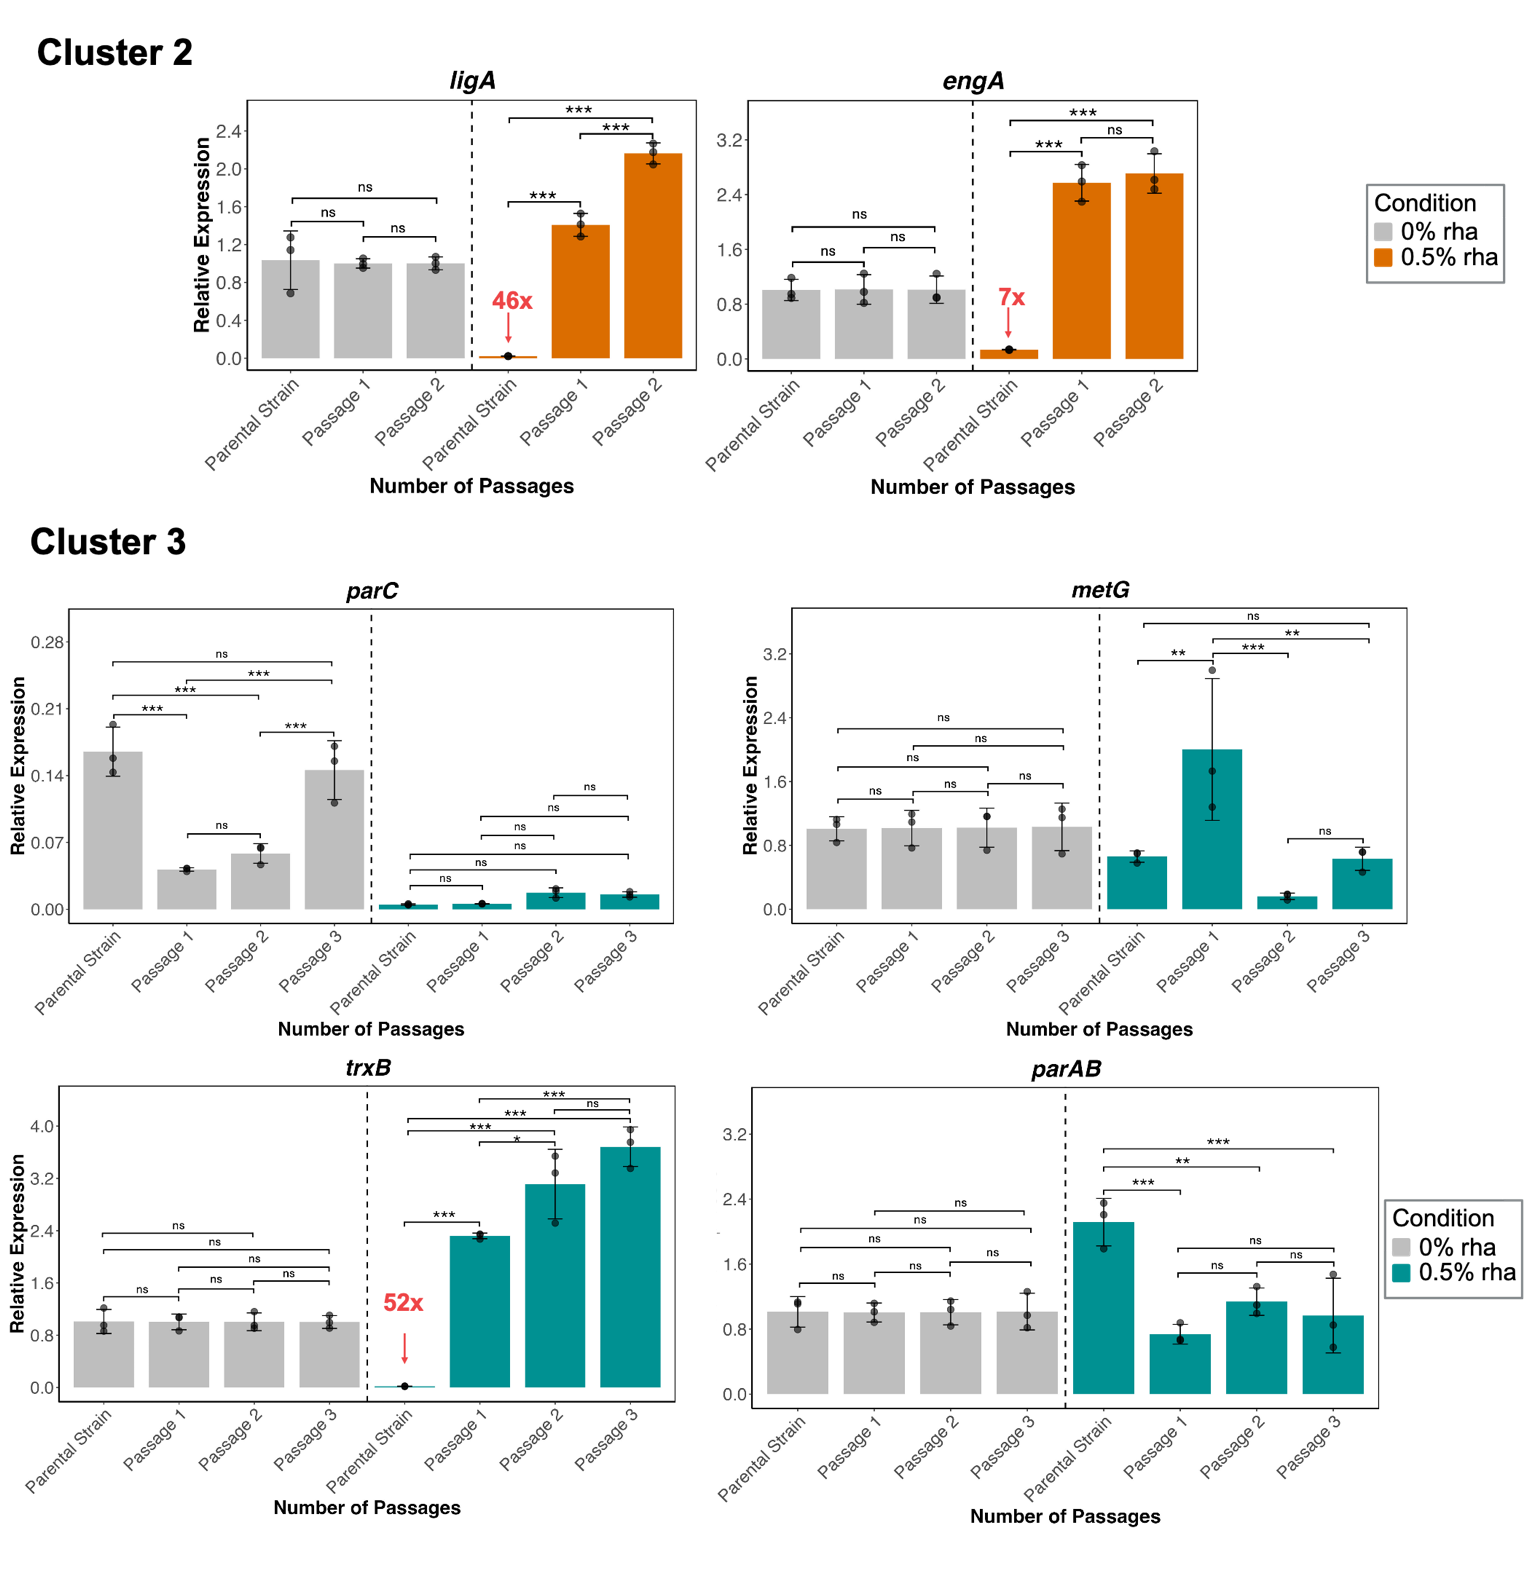


**Supplementary Figure 18.** Relative gene expression levels in CRISPRi mutants from Cluster 2 and 3. Expression levels were determined relative to *sigE* (sigma factor) and normalized to each parental strain under non-inducing conditions. Fold-change values were calculated using the 2^(ΔΔCt) method for data presentation. Statistical significance was assessed by two-way ANOVA performed on ΔΔCt values to evaluate the effects of passage and induction condition (***, p < 0.001; **, p < 0.01; *, p < 0.05). Black dots represent three independent biological replicates.


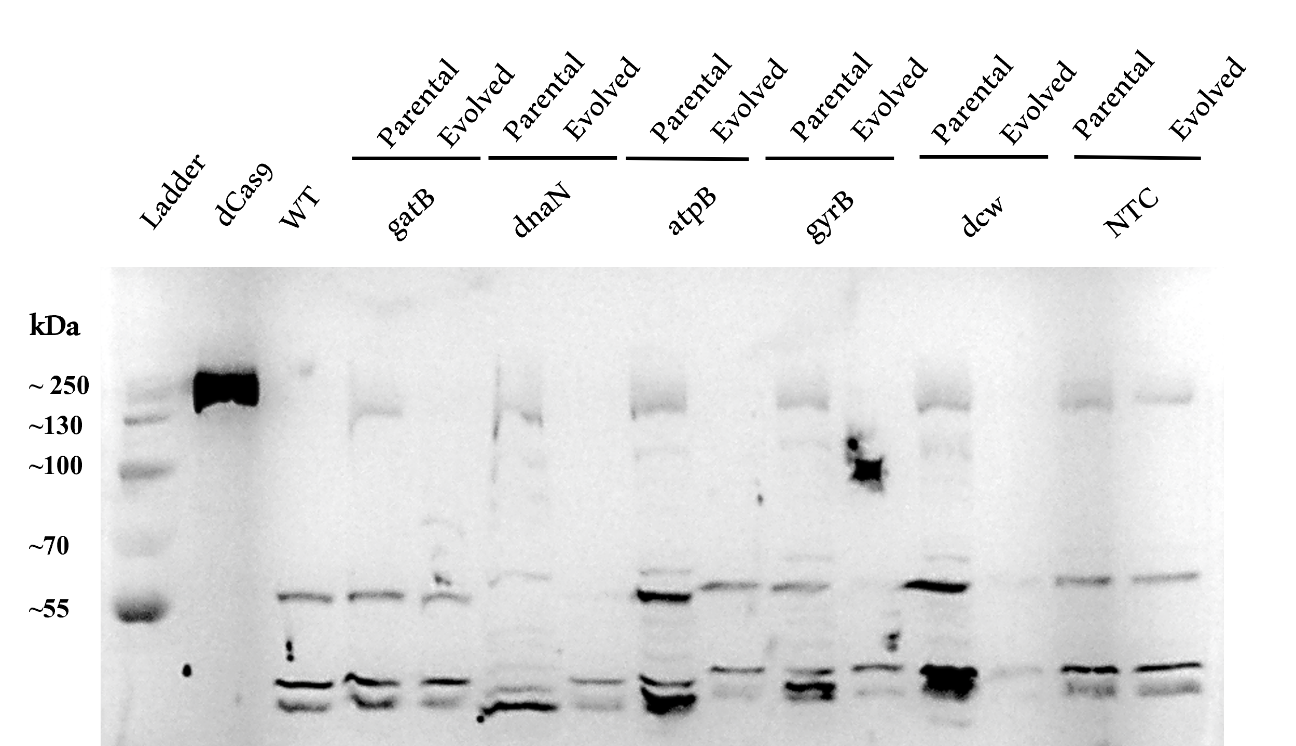


**Supplementary Figure 19**. Full Western Blot. Induction of dCas9 expression for parental and evolved strains is shown from left to right. Detection of dCas9 (~160 kDa) is shown in positive controls: purified dCas9 and parental strains induced with 0.5% rhamnose, a wild-type (WT) control was added as a negative control. Evolved CRISPRi mutants show a lack of dCas9 under dCas9-inducing conditions (0.5% rhamnose). In both parental and evolved CRISPRi NTC strains dCas9 protein was detected. Unspecific binding was detected in all strains, including the WT. Bacterial subcultures from overnights were grown in LB (trimethoprim 100μg/mL) until an OD600nm of 0.7 was reached; after, 0.5% rhamnose was added to induce dCas9 expression for 4 hours. Then, cells were pelleted down and resuspended in TNG buffer (100 mM Tris-HCl, 150 mM NaCl, 10% glycerol, pH 7.4). Cell lysis was done in three sonication cycles of 5 seconds. Soluble proteins were run on an 8% SDS gel. Proteins were transferred by iBlot and blocked in 5% skim milk-TBST. The dCas9 protein was detected using a primary mouse monoclonal antibody (ThermoFisher 10C11A12) and detected by chemiluminescence using a second antibody (goat polyclonal anti-mouse - ThermoFisher G-21060) linked to alkaline phosphatase.


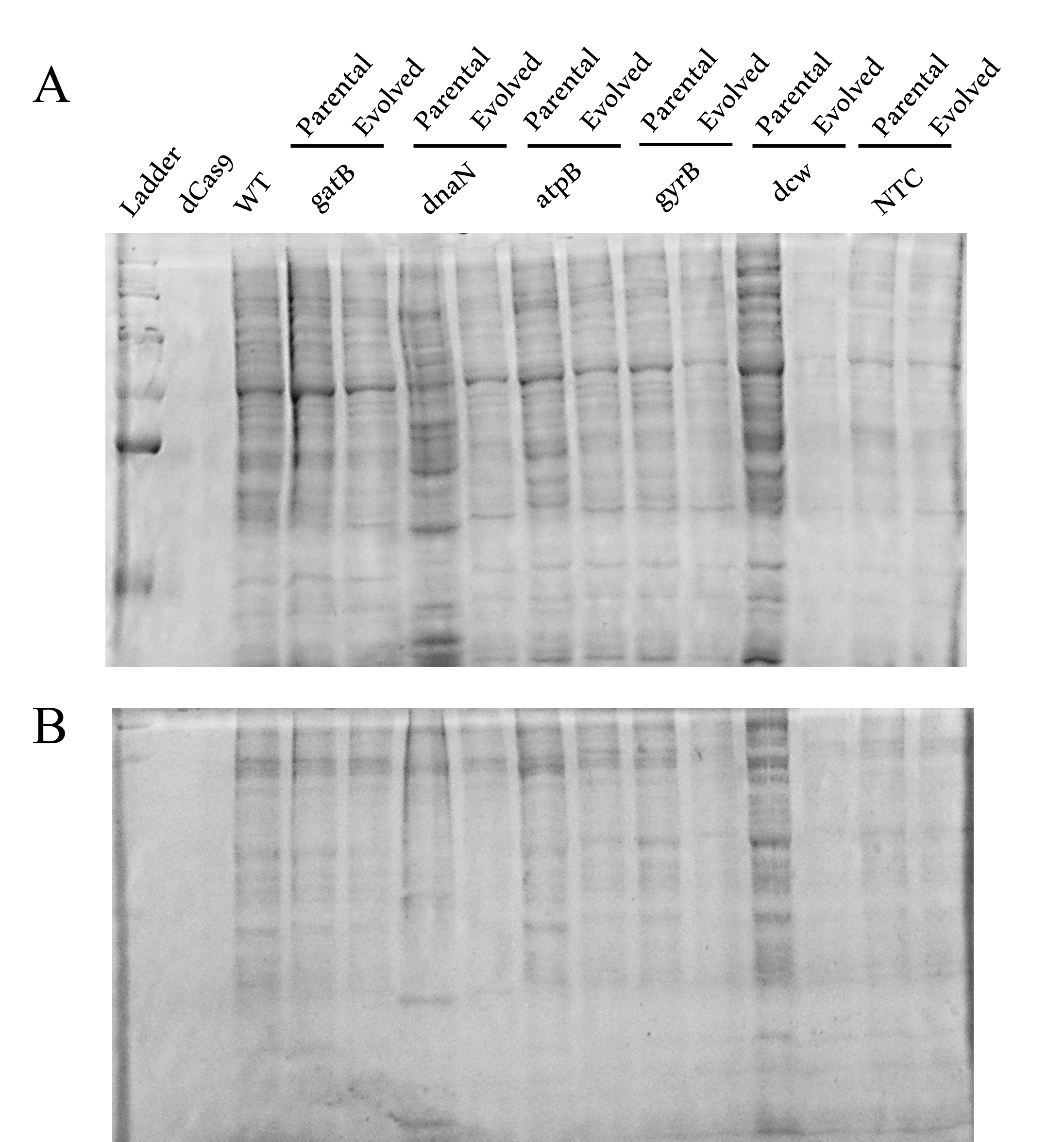


**Supplementary Figure 20.** SDS-PAGE loading controls for total protein confirmation.

(A) SDS-PAGE gel stained with Coomassie to demonstrate equal loading before transfer to the polyvinylidene difluoride (PVDF) membrane. (B) SDS-PAGE gel stained with Coomassie after transferring to the PVDF membrane presents the absence of the ladder, demonstrating successful transfer. The sample order for both gels is shown on the top.


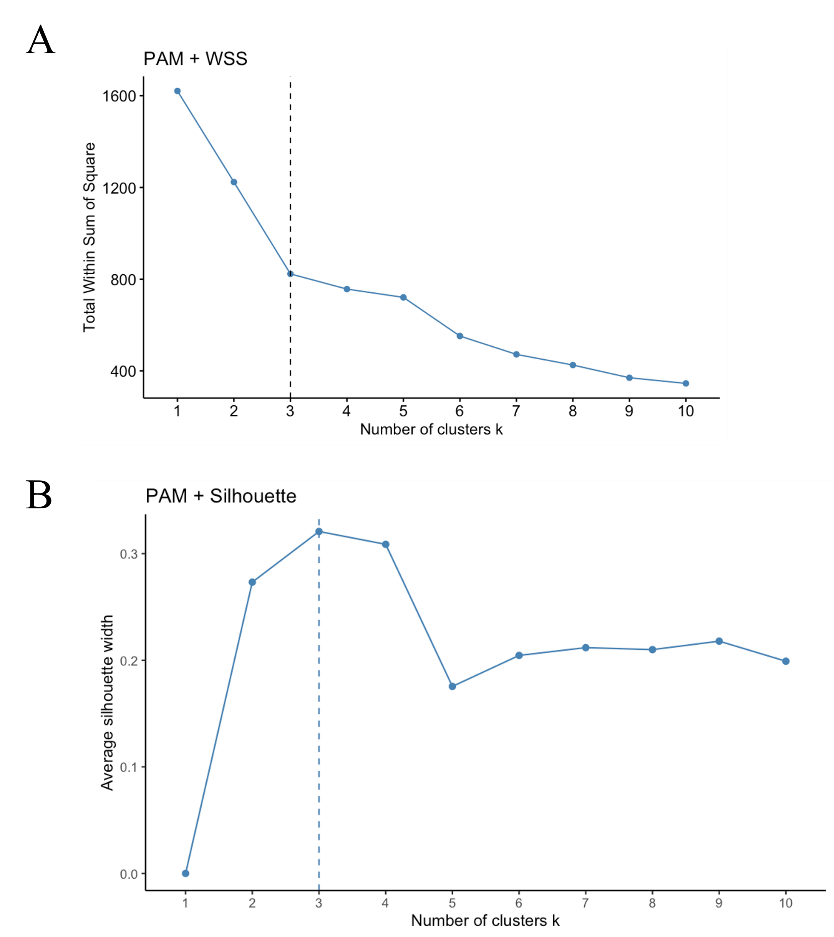


**Supplementary Figure 21.** Determination of the optimal number of clusters using WSS (Elbow) and Silhouette methods. The Within Sum of Squares (WSS) plot shows the “elbow” point, indicating three as the best number of clusters, marked by a sharp decrease in WSS. (B) The Silhouette method shows the average silhouette width for different cluster counts, with the highest score at three clusters.

**Supplementary Tables**

**Supplementary Table 1. Strains used in this study.**

| Strain | Description* | Source |
| --- | --- | --- |
| *B. cenocepacia* K56-2::dCas9/ pSCB2-sgRNAv2-*atpB* | Expressing sgRNA targeting *atpB* (K562_RS00155), dCas9 insertion, TpR | (Rahman *et al.,* 2024) |
| *B. cenocepacia* K56-2::dCas9/ pSCB2-sgRNAv2-*dnaN* | Expressing sgRNA targeting *dnaN* (K562_RS02185), dCas9 insertion, TpR | (Rahman *et al.,* 2024) |
| *B. cenocepacia* K56-2::dCas9/ pSCB2-sgRNAv2-*gyrB* | Expressing sgRNA targeting *gyrB* (K562_RS02180), dCas9 insertion, TpR | (Rahman *et al.,* 2024) |
| *B. cenocepacia* K56-2::dCas9/ pSCB2-sgRNAv2-*parC* | Expressing sgRNA targeting *parC* (K562_RS06290), dCas9 insertion, TpR | (Rahman *et al.,* 2024) |
| *B. cenocepacia* K56-2::dCas9/ pSCB2-sgRNAv2-*metG* | Expressing sgRNA targeting *metG* (K562_RS05945), dCas9 insertion, TpR | (Rahman *et al.,* 2024) |
| *B. cenocepacia* K56-2::dCas9/ pSCB2-sgRNAv2-*murC* | Expressing sgRNA targeting *murC* (K562_RS16815), dCas9 insertion, TpR | (Rahman *et al.,* 2024) |
| *B. cenocepacia* K56-2::dCas9/ pSCB2-sgRNAv2-*mrdAB* | Expressing sgRNA targeting *mrdAB* (K562_RS02475), Cas9 insertion, TpR | (Rahman *et al.,* 2024) |
| *B. cenocepacia* K56-2::dCas9/ pSCB2-sgRNAv2-*obgE* | Expressing sgRNA targeting *obgE* (K562_RS16670), dCas9 insertion, TpR | (Rahman *et al.,* 2024) |
| *B. cenocepacia* K56-2::dCas9/ pSCB2-sgRNAv2-*trxB* | Expressing sgRNA targeting *trxB* (K562_RS14600), dCas9 insertion, TpR | (Rahman *et al.,* 2024) |
| *B. cenocepacia* K56-2::dCas9/ pSCB2-sgRNAv2-*gatB* | Expressing sgRNA targeting *gatB* operon(K62_RS02505), dCas9 insertion, TpR | (Rahman *et al.,* 2024) |
| *B. cenocepacia* K56-2::dCas9/ pSCB2-sgRNAv2-*parAB* | Expressing sgRNA targeting *parAB* operon (K62_RS17180), dCas9 insertion, TpR | (Rahman *et al.,* 2024) |
| *B. cenocepacia* K56-2::dCas9/ pSCB2-sgRNAv2-*gmk* | Expressing sgRNA targeting *gmk* (K562_RS14475), dCas9 insertion, TpR | (Rahman *et al.,* 2024) |
| *B. cenocepacia* K56-2::dCas9/ pSCB2-sgRNAv2-*ligA* | Expressing sgRNA targeting *ligA* (K562_RS08175), dCas9 insertion, TpR | (Rahman *et al.,* 2024) |
| *B. cenocepacia* K56-2::dCas9/ pSCB2-sgRNAv2-*engA* | Expressing sgRNA targeting *engA* (K562_RS09275), dCas9 insertion, TpR | (Rahman *et al.,* 2024) |
| *B. cenocepacia* K56-2::dCas9/ pSCB2-sgRNAv2-*sodB* | Expressing sgRNA targeting *sodB* (K562_RS05385), dCas9 insertion, TpR | (Rahman *et al.,* 2024) |
| *B. cenocepacia* K56-2::dCas9/ pSCB2-sgRNAv2-non target | Expressing pSCB2-sgRNAv2, dCas9 insertion, TpR | (Rahman *et al.,* 2024) |

*TpR = trimethoprim resistance.

**Supplementary Table 2.** Essential genes in *Burkholderia cenocepacia* K56-2 selected for this study, COG category, pathway, and function description.

| COG category | Gene (product name) | Pathway | Function |
| --- | --- | --- | --- |
| Cycle Control, Cell Division, Chromosome Partitioning (D) | *dcw cluster* | Peptidoglycan biosynthesis | Division and cell wall cluster (*dcw*), of 15 genes responsible for peptidoglycan synthesis and cell division. |
| *engA* | Ribosome associated | Necessary for normal cell division and for the maintenance of normal septation. |
| DNA Replication, Recombination and Repair (L) | *dnaN* | DNA Replication | DNA polymerase III subunit beta, confers DNA tethering and processivity to DNA polymerases and other proteins. Acts as a clamp, forming a ring around DNA which diffuses in an ATP-independent manner freely and bidirectionally along dsDNA. |
| *parC* | DNA Replication | DNA topoisomerase IV, essential for chromosome segregation. It relaxes supercoiled DNA. Performs the decatenation events required during the replication of a circular DNA molecule. |
| *gyrB* | DNA Replication | Type II topoisomerase (DNA gyrase) that negatively supercoils closed circular double-stranded (ds) DNA to modulate DNA topology and maintain chromosomes in an underwound state. |
| *ligA* | Base excision repair | DNA ligase that catalyzes the formation of phosphodiester linkages between 5'-phosphoryl and 3'-hydroxyl groups in double-stranded DNA. |
| *parAB* | Chromosome and associated proteins | *parA parB* operon, chromosome partitioning protein systems that ensure active segregation of plasmid copies prior to cell division. |
| Energy Production and Conversion (C) | *atpB* | Metabolic pathways | ATP synthase subunit A, key component of the proton channel; plays a direct role in the translocation of protons across the membrane |
| *trxB* | Pyrimidine metabolism | Thioredoxin reductase, belongs to the class-II pyridine nucleotide-disulfide oxidoreductase family. |
| *sodB* | Ethylene biosynthesis | Superoxide dismutase, destroys radicals which are normally produced within the cells and which are toxic to biological systems. |
| Translation (J) | *gatB* | Aminoacyl-tRNA biosynthesis | Amidotransferase subunit B, allows the formation of correctly charged Asn-tRNA(Asn) or Gln-tRNA(Gln). |
| *metG* | Aminoacyl-tRNA biosynthesis | Methionine tRNA ligase, required not only for elongation of protein synthesis but also for the initiation of all mRNA translation through initiator tRNA(fMet) aminoacylation. |
| *obgE* | Ribosome biogenesis biogenesis | GTPase, which plays a role in control of the cell cycle, stress response and ribosome biogenesis. |
| Nucleotide transport and metabolism (F) | *gmk* | Purine metabolism | Guanylate kinase, essential for recycling GMP and indirectly, cGMP. |
| Cell Wall, Membrane, Envelope Biogenesis (M) | *mrdAB* | Peptidoglycan biosynthesis | Cell wall shape-determining proteinC, catalyzes cross-linking of the peptidoglycan cell wall. |

**Supplementary Table 3.** Growth parameters obtained with R package “*growthcurver*” for CGP characterization and cluster analysis.

| Argument/Parameter | Description |
| --- | --- |
| Initial population size (n0) | Initial population size at the beginning of the growth curve. |
| Growth rate (r/µ) | Increase of cells proportional to the number of bacteria present at that time. The constant of proportionality, µ, is an index of the growth rate and is called the growth rate constant. |
| Deceleration phase (t_mid) | The time at the inflection point of the logistic curve (end of logarithmic phase), also known as deceleration or stationary phase. |
| Generation time (t_gen) | Defined by the time (or predictable time) needed under optimal conditions, for a population of cells (bacteria) to double in number. |
| Apparent lag time (lag) | Starting point of the S-curve, cells are adapting. Although cells are active, they do not start dividing during the lag phase. The length of the lag phase will also depend on the age and general viability of the cells in the inoculum. |
| Maximum OD (Max OD) | Maximum optical density (OD) at the end of the curve. |

Supplementary Table 4. List of sgRNAs, locus tags and protein IDs used for essential-gene knockdown in *Burkholderia cenocepacia* K56-2.

| Gene (product name) | | sgRNA | sgRNA GC% content | | PAM | Locus tag(s) | Protein ID(s) |
| --- | --- | --- | --- | --- | --- | --- | --- |
| *dcw cluster* | ACTTTCCGCTCTCCCGTTCA | | | 55 | GGG | K562_RS16815 | WP_006487098.1 |
| K562_RS16810 | WP_006487084.1 |
| K562_RS16805 | WP_006477019.1 |
| K562_RS16800 | WP_006487155.1 |
| K562_RS16790 | WP_006487111.1 |
| K562_RS16785 | WP_006487095.1 |
| K562_RS16780 | WP_006487105.1 |
| K562_RS16775 | WP_006477014.1 |
| K562_RS16770 | WP_006487138.1 |
| K562_RS16765 | WP_006487140.1 |
| *engA* | GGTTTCATCTGTGTTTTCTA | | | 35 | GCC | K562_RS09275 | WP_006493685.1 |
| *dnaN* | GGCTCTTGGCCCGCCACCAC | | | 75 | GCC | K562_RS02185 | WP_006493926.1 |
| *parC* | GCTGAATTTCGTCATTCATC | | | 40 | CCC | K562_RS06290 | WP_006487625.1 |
| *gyrB* | GCCCGCCCCAAGTGCCGAAA | | | 70 | GGA | K562_RS02180 | WP_006490993.1 |
| *ligA* | TTGGGTTCGGGCCATGCTGG | | | 65 | GCC | K562_RS08175 | WP_006484653.1 |
| *parAB* | GGTTTATGCGCATAAACGAG | | | 45 | GCC | K562_RS17180 | WP_006485146.1 |
| *atpB* | CGATAGTTGCAAGTGATTCA | | | 40 | TCC | K562_RS00155 | WP_012492242.1 |
| *trxB* | GACATGTGCGAATCCGTAAA | | | 45 | TCC | K562_RS14600 | WP_006491171.1 |
| *sodB* | CGGCGGGAGCGTATGAGCCA | | | 70 | GGT | K562_RS05385 | WP_006489396.1 |
| *gatB* | GGTCAGGGCCATGCGATCAC | | | 65 | GCC | K562_RS02505 | WP_006494379.1 |
| *metG* | TCGGATGCGGACATAGGGTC | | | 60 | GGT | K562_RS05945 | WP_006493649.1 |
| *obgE* | TCCGCTATTGTGCCGCGCGC | | | 70 | GGC | K562_RS16670 | WP_006489254.1 |
| *gmk* | TCATGGTTCGTCTCGCCGTC | | | 60 | GGT | K562_RS14475 | WP_006486663.1 |
| *mrdAB* | CGTTGAATTCGGTCATTTAA | | | 35 | GGG | K562_RS02475 | WP_006482564.1 |
| NTC* | CGCCGTGCACTCGCGCCGCC | | | 85 | NA | NA | NA |

*NTC = Non-Targeting Control, NA = Not Applicable

**Supplementary Table 5.** SNP analysis all mutants. Provided as a separate Excel file

**Supplementary Table 6.** Unique mutation analysis. Provided as a separate Excel file

**Supplementary Table 7.** Unique mutations found in evolved CRISPRi mutants, relative to both NTC evolved control and wild type reference genome

| **Mutant** | **Locus affected** | **Encoded Product** | **Mutation** |
| --- | --- | --- | --- |
| dcw | K562_RS18055 | malate:quinone oxidoreductase (Mqo) | insertion upstream of the start codon |
| dnaN | K562_RS32635 | hypothetical protein. | frameshift affecting reading frame |
| gatB | K562_RS12890 | IS66-like element ISBcen19 family transposase | insertion causing frameshift and early termination |
| gyrB | K562_RS10405 | sugar/ribose ABC transporter ATP-binding protein | insertion causing a frameshift affecting the stop codon |
| gyrB | K562_RS01770 | type VI secretion system baseplate subunit TssK | deletion causing frameshift and early termination |
| gyrB | K562_RS00260 | ABC transporter substrate-binding protein | deletion causing frameshift and early termination |
| gyrB | K562_RS18470 | 3-oxoacyl-ACP synthase | deletion causing frameshift and early termination |
| gyrB | K562_RS18055 | malate:quinone oxidoreductase (Mqo) | insertion upstream of start codon |
| gyrB | K562_RS31725 | IS3 family transposase | deletion causing frameshift affecting the stop codon |

Supplementary Table 8. List of designed and validated primers for RT-qPCR targeting essential genes in *Burkholderia cenocepacia* K56-2.*

| Target Gene | Primer sequences(5’- 3’) | Locus Tag | Efficiency (%) | R2 |
| --- | --- | --- | --- | --- |
| *atpB* | Forward:  CATGTGGAGCTTCGGTGG | K562_RS00155 | 94.90 | 0.997 |
| Reverse: CCGAGATACACCAGCGTCAG |
| *dnaN* | Forward:  CGTGACGTTGAAGCCGATG | K562_RS02185 | 93.69 | 0.985 |
| Reverse:  GATCAGGAAGAGGCGCAGG |
| *murC dcw cluster* | Forward:  GATCAGGAAGAGGCGCAGG | K562_RS16765 | 97.03 | 0.996 |
| Reverse: CGAGATGGACAAGTGCTTCCAG |
| *gatB* | Forward:  GTCGGCCAGGAGAAGTTCG | K562_RS02510 | 100.34 | 0.995 |
| Reverse: CTTCGTAATTGATCGCTTCCTCG |
| *gyrB* | Forward: GAAGATGAACGACAAGCACG | K562_RS02180 | 94.19 | 0.991 |
| Reverse:  CCTTGTAGCTGTTCTGGTCG |
| *engA* | Forward: GGAAACCTACAAGCGCTACC | K562_RS09275 | 96.52 | 0.989 |
| Reverse:  CGGAACTCTATGCGCAATGG |
| *ligA* | Forward:  GCTCGACTTCTTCCGCAAG | K562_RS08175 | 90.64 | 0.887 |
| Reverse:  GTTGACCTTGTAGACGACGC |
| *metG* | Forward:  GAAGGATCGGACAAGCTGC | K562_RS05945 | 108.43 | 0.943 |
| Reverse:  GAAGGATCGGACAAGCTGC |
| *parAB* | Forward:  CGCCTGCTCCGGAATTCAC | K562_RS17180 | 90.07 | 0.982 |
| Reverse:  GATTCTCGAGACGCCACGC |
| *parC* | Forward:  GCAGGCCGAGGACATTC | K562_RS06290 | 100.90 | 0.972 |
| Reverse: GAGTTCCTTCTCGATCTTGATC |
| *trxB* | Forward:  CACATCCACACCGCGAAAC | K562_RS14600 | 97.45 | 0.987 |
| Reverse:  CGAATCGCACGTGTACTCG |

*Note: linear regression analysis was performed to obtain primer efficiency and R2.
